# Supplementary material for: The role of catchment characteristics, sewer network, SWMM model parameters in urban catchment management based on stormwater flooding: modelling, sensitivity analysis, risk assessment
Source: Copernicus journal article supplement (doi:10.5194/hess-2022-109), 2022-03-23
Supplement: Supplementary file 1 [file hess-2022-109-supplement.pdf]

# **The role of catchment characteristics, sewer network, SWMM model parameters in urban catchment management based on stormwater flooding: modelling, sensitivity analysis, risk assessment**

5 Bartosz Szela<sup>1</sup>, Adam Kiczko<sup>2</sup>, Grzegorz Wa<sup>3</sup>, Ewa Wojciechowska<sup>4</sup>, Micha<sup>5</sup>, Francesco Fatone<sup>6</sup>

<sup>1</sup> Faculty of Environmental, Geomatic and Energy Engineering, Kielce University of Technology, 25-314 Kielce, Poland

<sup>2</sup> Institute of Environmental Engineering, Warsaw University of Life Sciences-SGGW, 02-797 Warsaw, Poland

<sup>3</sup> Institute of Geography and Environmental Sciences, Jan Kochanowski University in Kielce, 25 – 406, Kielce, Poland

<sup>4</sup> Faculty of Civil and Environmental Engineering, Gdansk University of Technology, 80-233 Gdansk, Poland

10 <sup>5</sup> Faculty of Law and Social Sciences, Jan Kochanowski University, 25 – 406, Kielce, Poland

<sup>6</sup> Department of Science and Engineering of Materials, Environment and Urban Planning-SIMAU, Polytechnic University of Marche Ancona, 60121 Ancona, Italy

*Correspondence to:* Bartosz Szela (bszelag@tu.kielce.pl)

15

20

25

30

35 **Section 1**

*Measures of fit between computed results and measurements in a logistic regression model*

- accuracy (Acc)

$$Acc = \frac{TP+TN}{TP+TN+FP+FN} \quad (1)$$

- sensitivity (SENS)

40

$$Sens = \frac{TP}{TP+FN} \quad (2)$$

and specificity (SPEC)

$$Spec = \frac{TN}{TN+FP} \quad (3)$$

where  $TP, TN, FP$ , and  $FN$  denote true positives (correctly identified of the  $\kappa \geq 13 \text{ m}^3 \cdot \text{ha}^{-1}$ ), true negatives (correctly identified lack of  $\kappa \geq 13 \text{ m}^3 \cdot \text{ha}^{-1}$ ), false positives ( $\kappa < 13 \text{ m}^3 \cdot \text{ha}^{-1}$  incorrectly identified as  $\kappa \geq 13 \text{ m}^3 \cdot \text{ha}^{-1}$ ) and false negatives ( $\kappa \geq 13 \text{ m}^3 \cdot \text{ha}^{-1}$  incorrectly identified as  $\kappa < 13 \text{ m}^3 \cdot \text{ha}^{-1}$ ), respectively.

45

50

**Section 2**

*Regional model of convective rainfall*

To calculate the convective rainfall, the regional rainfall model for Poland was used (Kupczyk and Suligowski, 2000; Suligowski, 2004). In this model the rainfall depth for the assumed rainfall duration is determined from the formula:

55

$$P_{con}(t_r) = a_1 \cdot t_r^2 + a_2 \cdot t_r + a_0 \quad (4)$$

where:  $t_r$  – duration of rainfall (min);  $P_{con}(t_r)$  – maximum convective rainfall depth (mm);  $a_0, a_1, a_2$  – empirical coefficients determined by the method of least squares. The model includes data for 30 rainfall stations in Poland, for which  $a_i$  ( $a_0, a_1, a_2$ ) coefficients were determined using rainfall data from the period of 20 - 30 years (Suligowski 2004). For the catchment area covered by the calculations (świętokrzyskie voivodship) the values are as follows:  $a_0 = 6.55$ ;  $a_1 = - 1.10$ ,  $a_2 = 6.68$ .

60

65 **Table S1. Ranges of SWMM model parameters**

| Parameters                                                            | Unit              | Range |       |
|-----------------------------------------------------------------------|-------------------|-------|-------|
|                                                                       |                   | Min   | Max   |
| Coefficient for flow path width ( $\alpha$ )                          | -                 | 2.7   | 4.7   |
| Retention depth of impervious areas ( $d_{imp}$ )                     | mm                | 0.8   | 4.8   |
| Retention depth of pervious areas ( $d_{per}$ )                       | mm                | 0.8   | 6.8   |
| Manning roughness coefficient for impervious areas ( $n_{imp}$ )      | $m^{-1/3}\cdot s$ | 0.01  | 0.022 |
| Manning roughness coefficient for pervious areas ( $n_{per}$ )        | $m^{-1/3}\cdot s$ | 0.16  | 0.2   |
| Manning roughness coefficient for sewer channels ( $n_{sew}$ )        | $m^{-1/3}\cdot s$ | 0.01  | 0.048 |
| Correction coefficient for sub-catchments slope ( $\gamma$ )          | -                 | 0.7   | 1.275 |
| Correction coefficient for percentage of impervious areas ( $\beta$ ) | -                 | 0.8   | 1.375 |

**Table. S2. Values of coefficients ( $\alpha_i$ ), standard deviations ( $\sigma_i$ ), test probabilities (p) for the logit model to calculate the probability of specific flood volume.**

70

| Variable  | Value ( $\alpha_i$ ) | St. derivation ( $\sigma_i$ ) | p – test |
|-----------|----------------------|-------------------------------|----------|
| Intercept | -54.146              | 1.863                         | < 0.0001 |
| $t_r$     | -0.218               | 0.001                         | < 0.0001 |
| $P_t$     | 4.055                | 0.036                         | < 0.0001 |
| $\alpha$  | 0.235                | 0.012                         | < 0.0001 |
| $n_{imp}$ | -79.397              | 1.251                         | < 0.0001 |
| $d_{imp}$ | -0.072               | 0.006                         | < 0.0001 |
| $\beta$   | 6.233                | 0.051                         | < 0.0001 |
| $\gamma$  | 0.333                | 0.043                         | < 0.0001 |
| $n_{sew}$ | 234.125              | 1.145                         | < 0.0001 |
| Imp       | 79.403               | 4.836                         | < 0.0001 |
| Vk        | -0.010               | 0.000                         | < 0.0001 |
| Gk        | -1967.036            | 113.936                       | < 0.0001 |
| Jkp       | -20.331              | 6.775                         | 0.0027   |
| Impd      | 42.912               | 2.389                         | < 0.0001 |
| Gkd       | -1169.004            | 66.862                        | < 0.0001 |

75

**Table. S3. Agreement of the results of calculating the probability of exceeding the specific flood volume with the logistic regression model and the hydrodynamic SWMM**

| Sub - catchment |   |   |   |   |   |   |   |   |   |
|-----------------|---|---|---|---|---|---|---|---|---|
| $t_r$ [min]     | J | K | L | M | N | O | P | R | S |
| variant I       |   |   |   |   |   |   |   |   |   |
| 30              | + | + | + | + | + | + | + | + | + |
| 40              | + | + | + | + | + | + | + | + | + |
| 50              | + | + | + | + | + | + | + | + | + |
| 60              | + | + | + | + | + | + | + | - | - |
| variant III     |   |   |   |   |   |   |   |   |   |
| 30              | + | + | + | + | + | + | + | + | + |
| 40              | + | + | + | + | + | + | + | + | + |
| 50              | + | + | + | + | + | + | + | + | + |
| 60              | + | + | + | + | + | + | - | - | + |

80

85

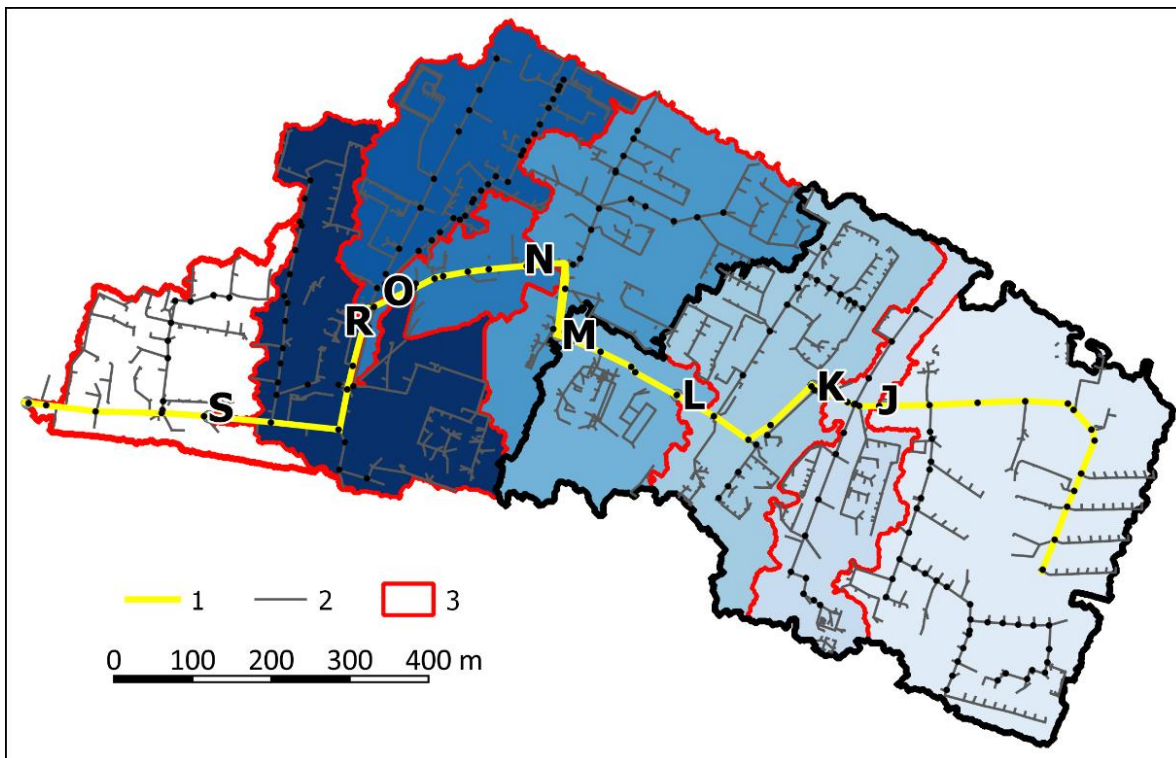

Figure. S1. Scheme of analysed catchment (Walek, 2019).

90

95

100

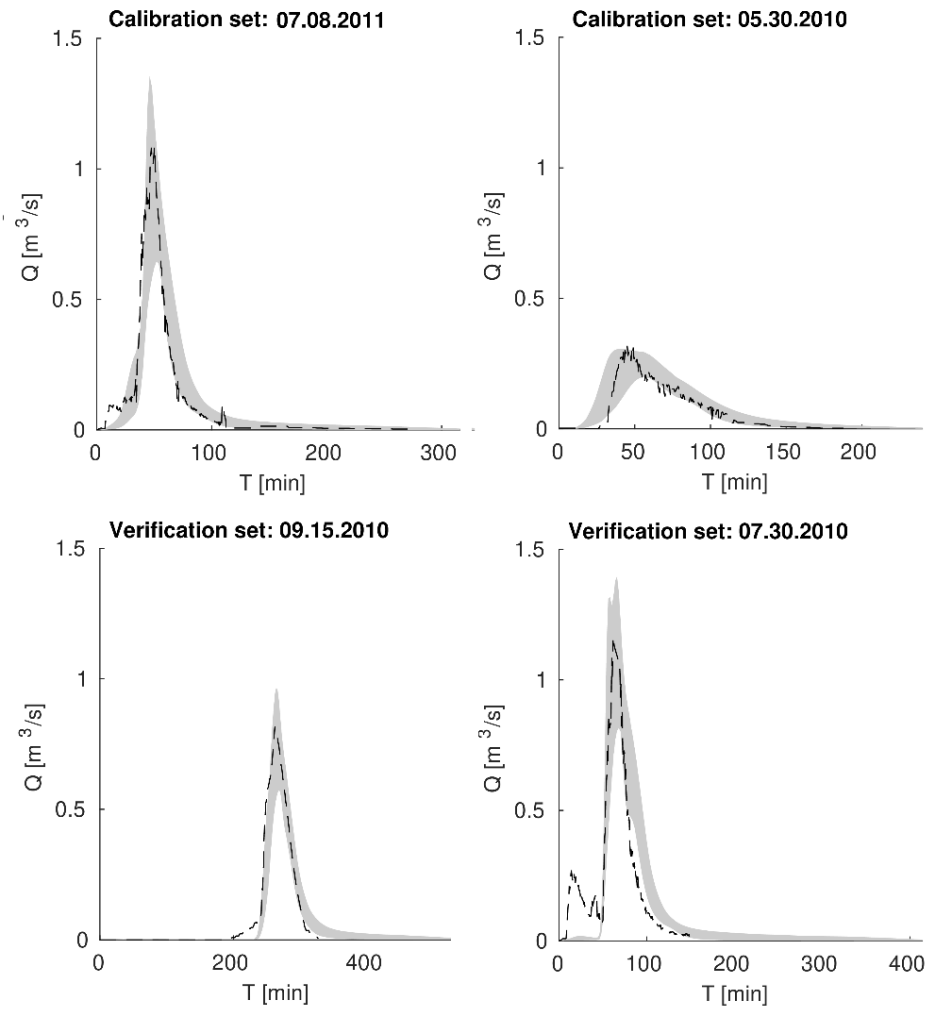

105

**Figure S2. Comparison of the measured hydrographs of storm water runoff from the catchment with 95% confidence intervals determined via the SWMM model.**

110

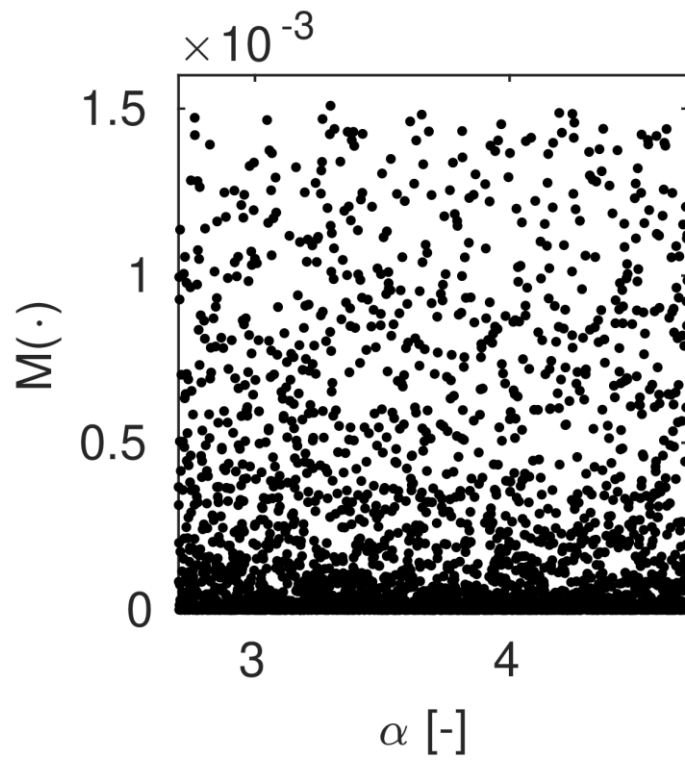

115

Figure. S3. Influence of coefficient for flow path width ( $\alpha$ ) on the likelihood function ( $M$ ).

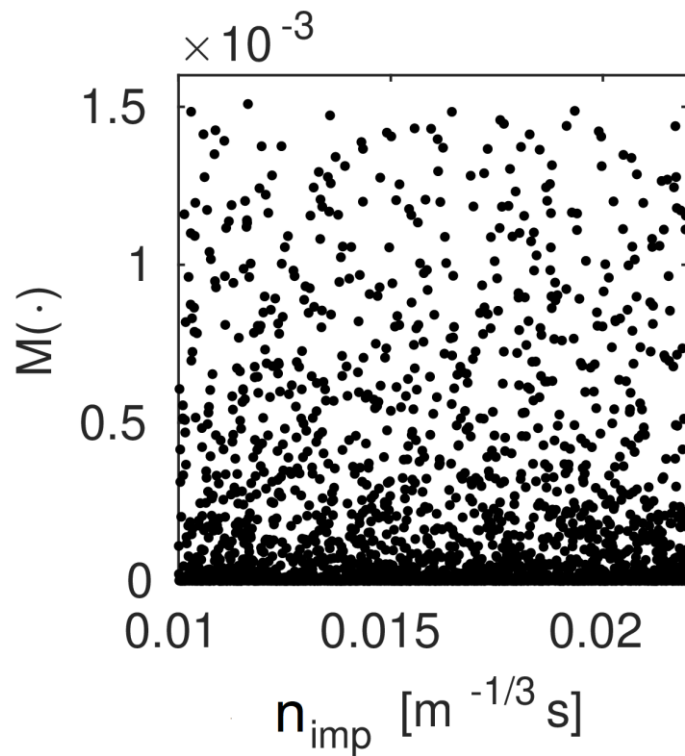

Figure S4. Influence of Manning roughness coefficient for impervious areas ( $n_{\text{imp}}$ ) on the likelihood function ( $M$ ).



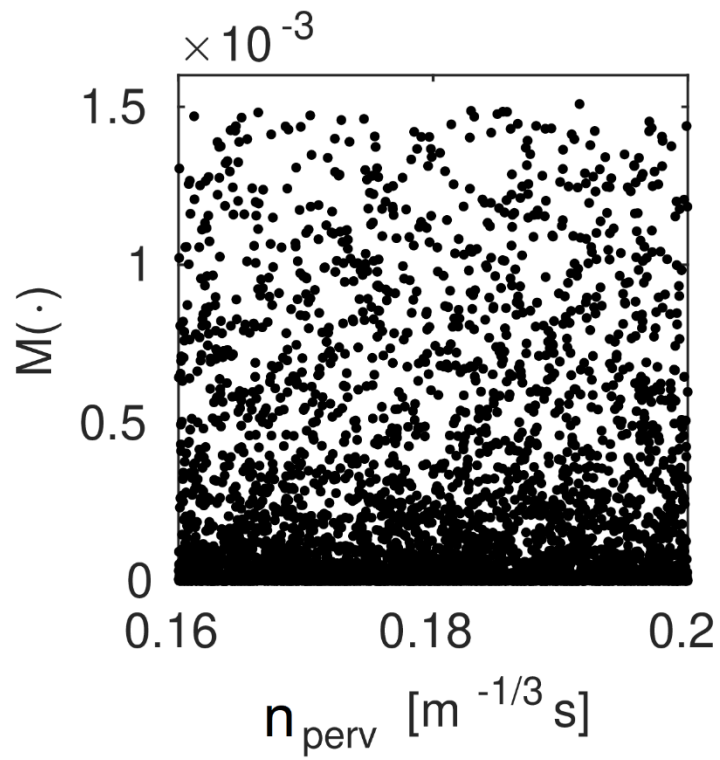

**Figure S5. Influence of Manning roughness coefficient for pervious areas ( $n_{\text{per}}$ ) on the likelihood function ( $M$ ).**

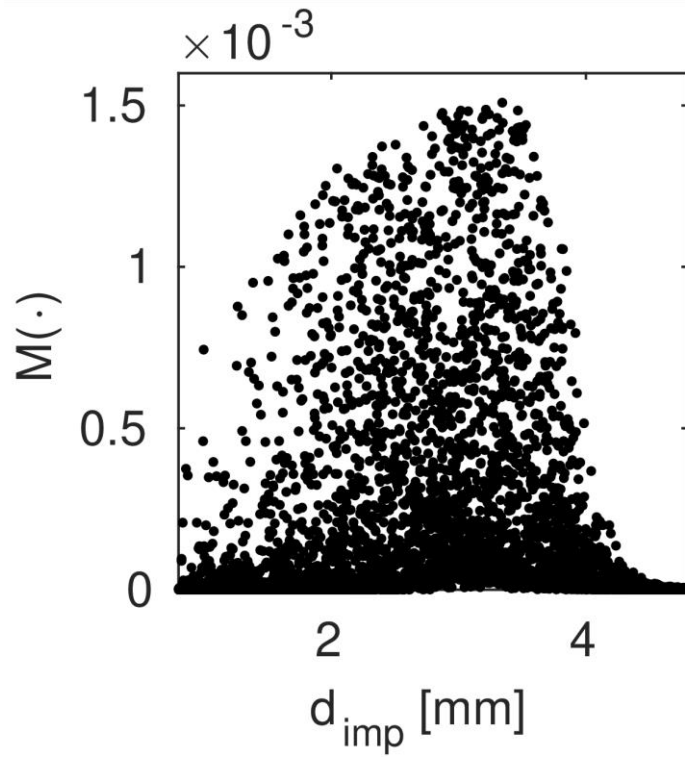

**Figure S6. Influence of retention depth of impervious areas ( $d_{\text{imp}}$ ) on the likelihood function ( $M$ ).**

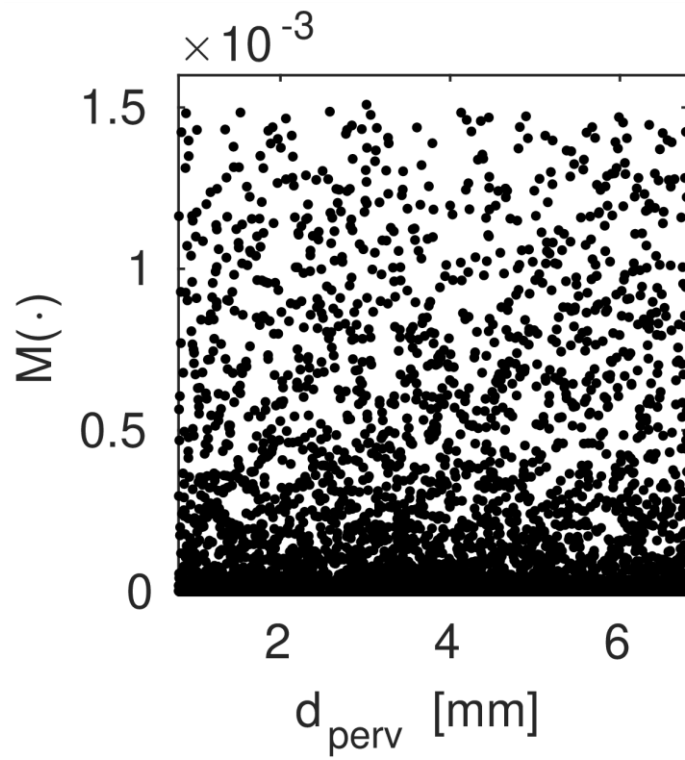

**Figure S7. Influence of retention depth of pervious areas ( $d_{\text{per}}$ ) on the likelihood function ( $M$ ).**

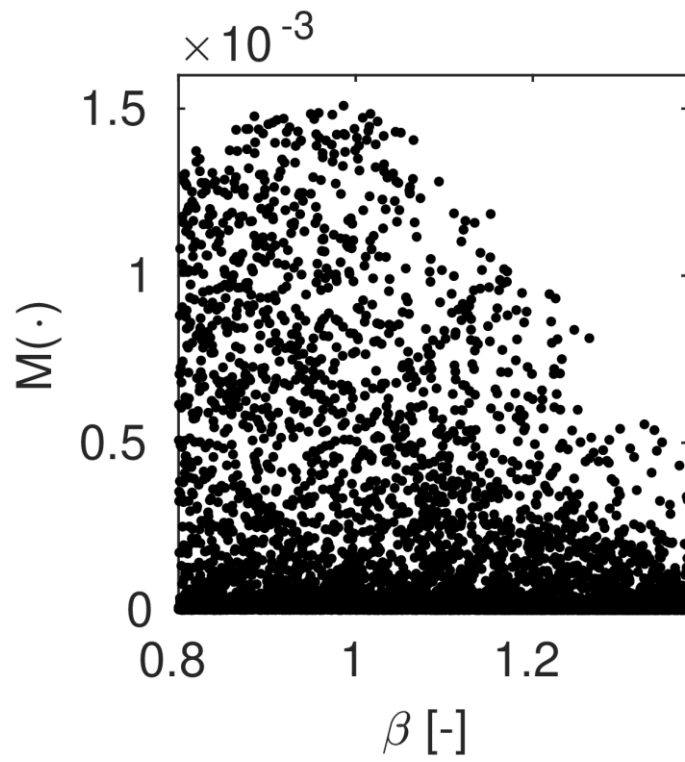

135

**Figure S8. Influence of correction coefficient for percentage of impervious areas ( $\beta$ ) on the likelihood function ( $M$ ).**

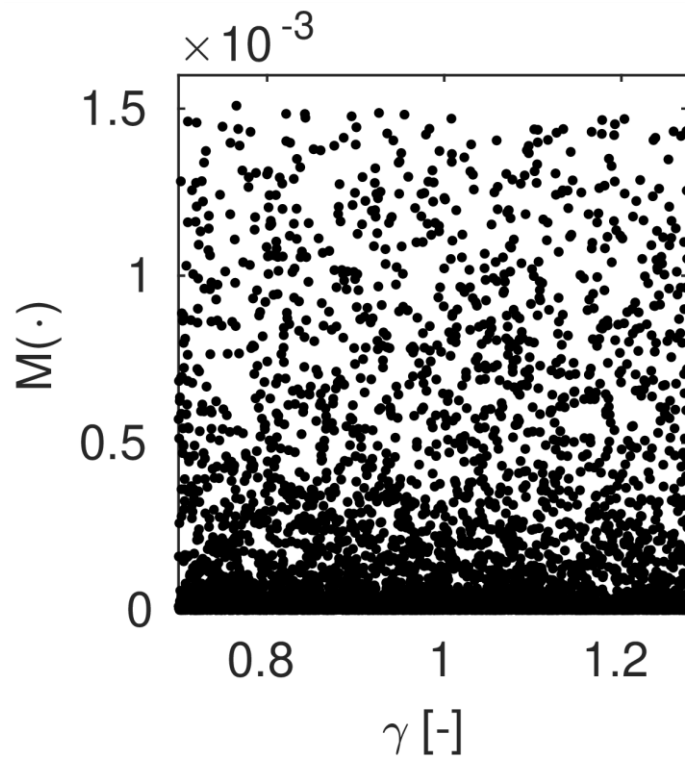

Figure. S9. Influence of correction coefficient for sub-catchments slope ( $\gamma$ ) on the likelihood function ( $M$ ).

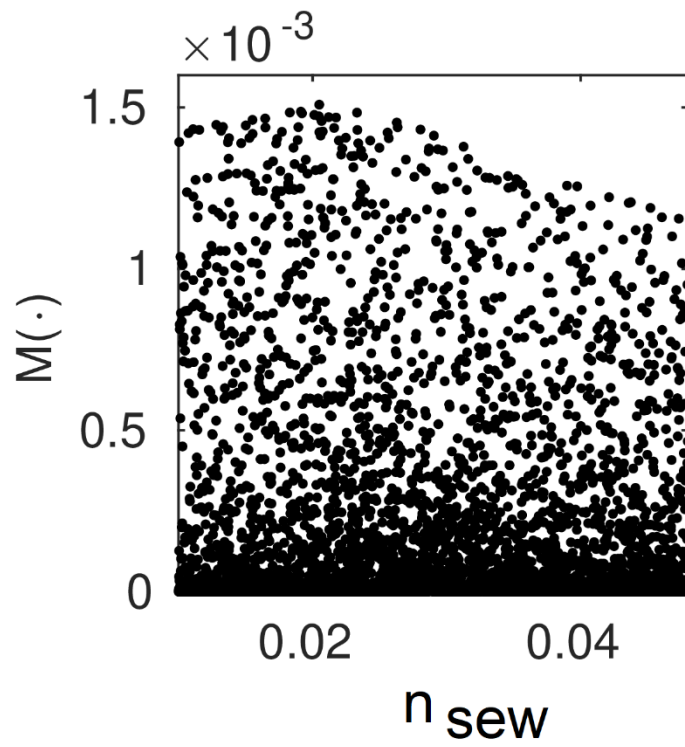

**Figure S10. Influence of Manning roughness coefficient for sewer channels ( $n_{\text{sew}}$ ) on the likelihood function ( $M$ ).**

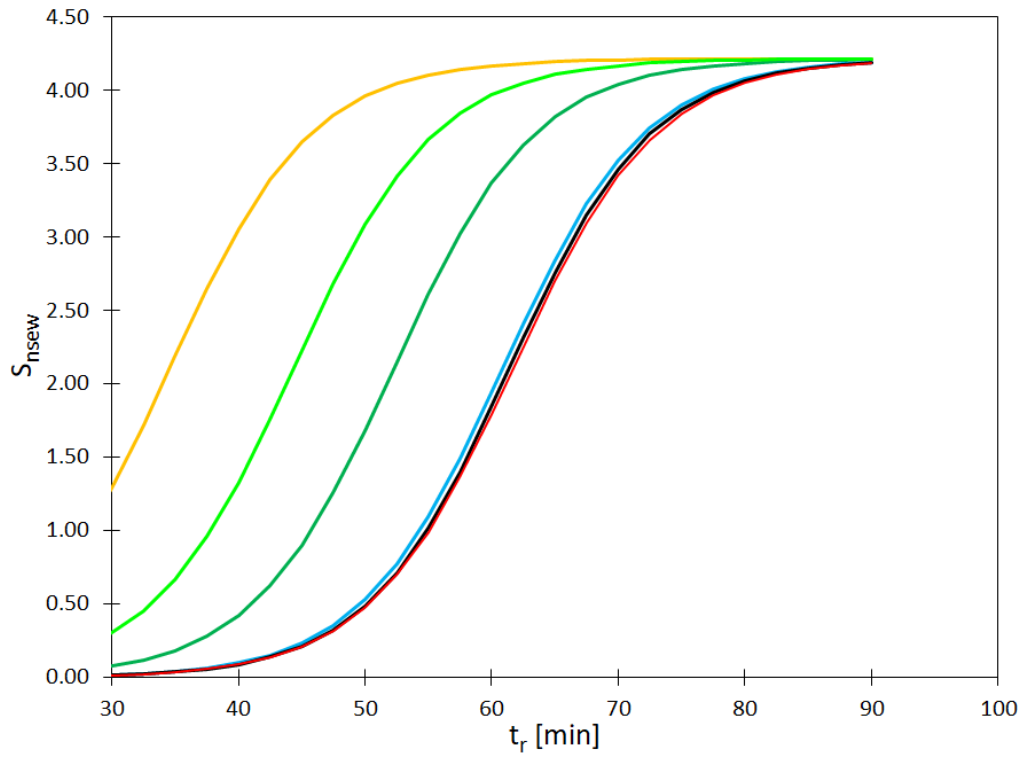

**Figure S11. Influence of rainfall duration ( $t_r$ ) depending on catchment and stormwater network characteristics (Imp, Impd, Vk, Jkp, Gk) on the sensitivity coefficient  $S_{nsew}$ .**

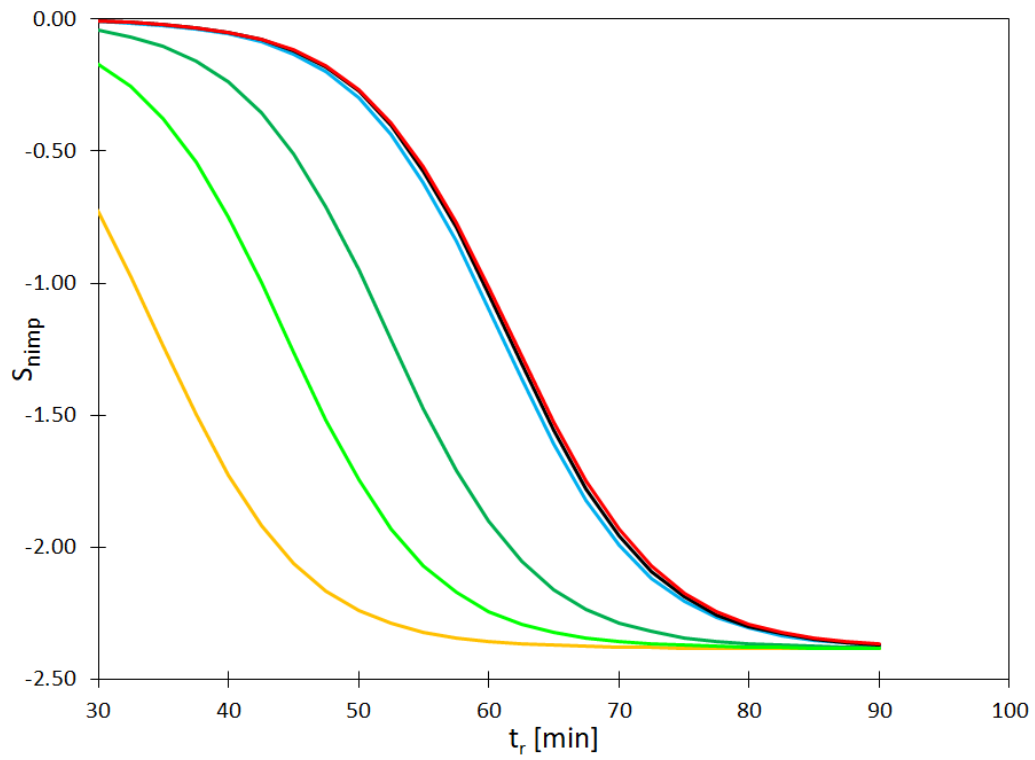

150

**Figure S12. Influence of rainfall duration ( $t_r$ ) depending on catchment and stormwater network characteristics (Imp, Impd, Vk, Jkp, Gk) on the sensitivity coefficient  $S_{nimp}$ .**



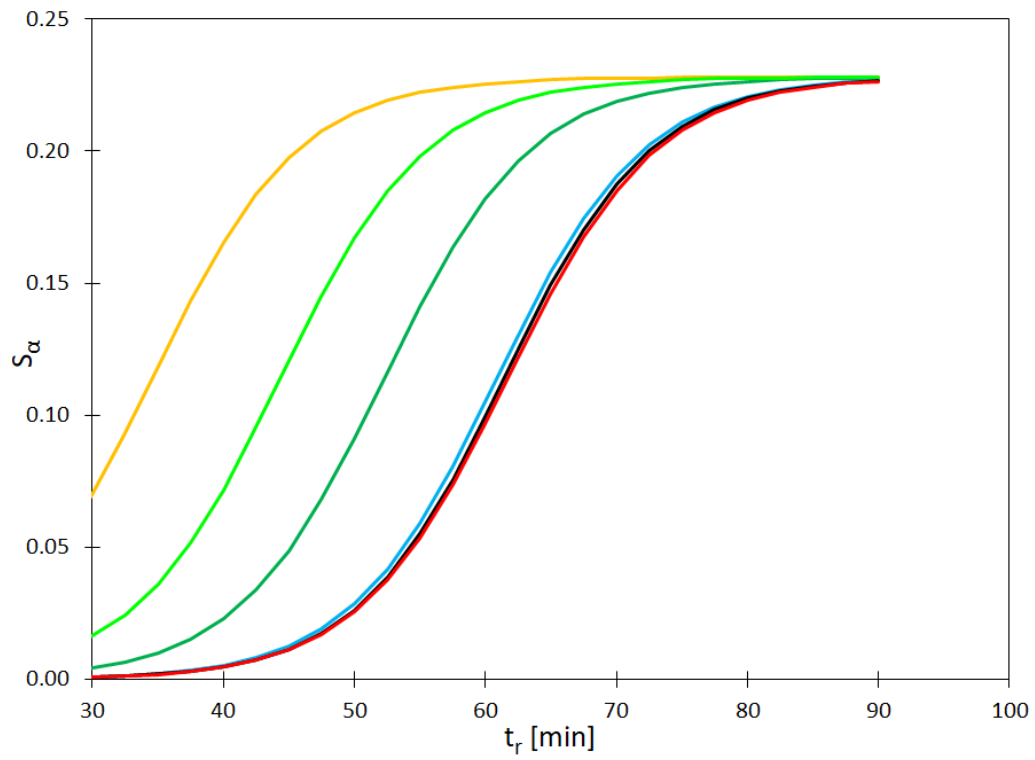

155 **Figure S13. Influence of rainfall duration ( $t_r$ ) depending on catchment and stormwater network characteristics (Imp, Impd, Vk, Jkp, Gk) on the sensitivity coefficient  $S_\alpha$ .**

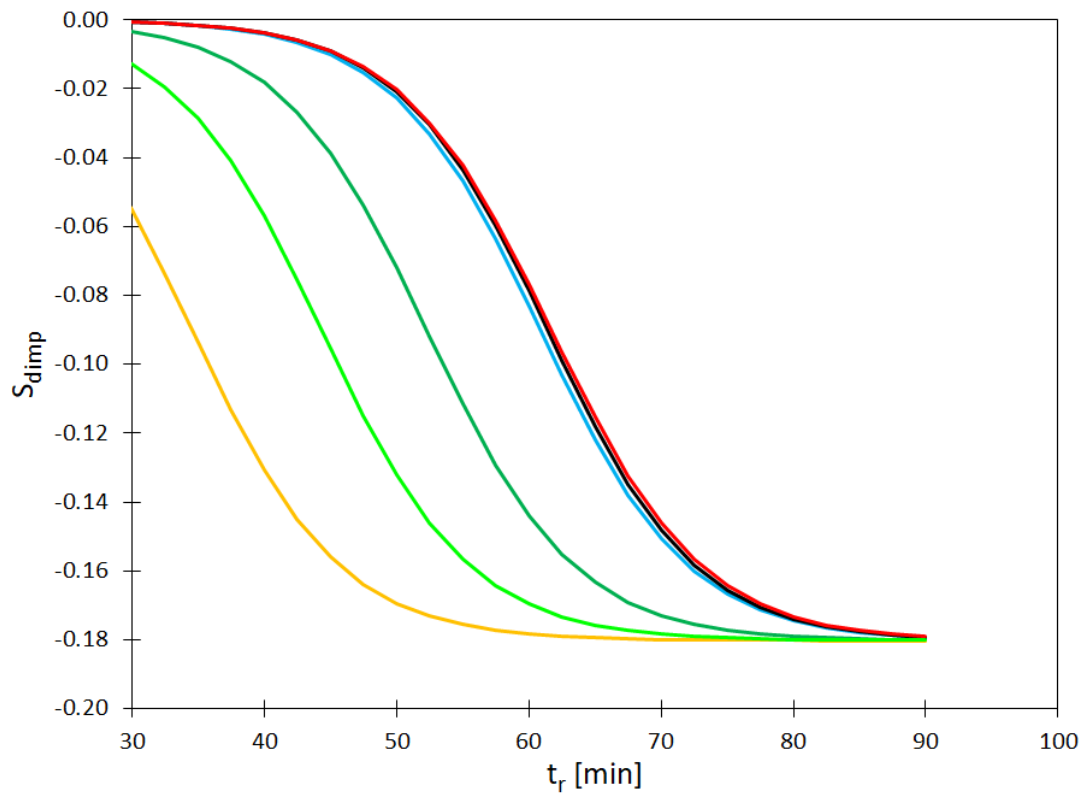

**Figure S14. Influence of rainfall duration ( $t_r$ ) depending on catchment and stormwater network characteristics (Imp, Impd, Vk, Jkp, Gk) on the sensitivity coefficient  $S_{dimp}$ .**

160

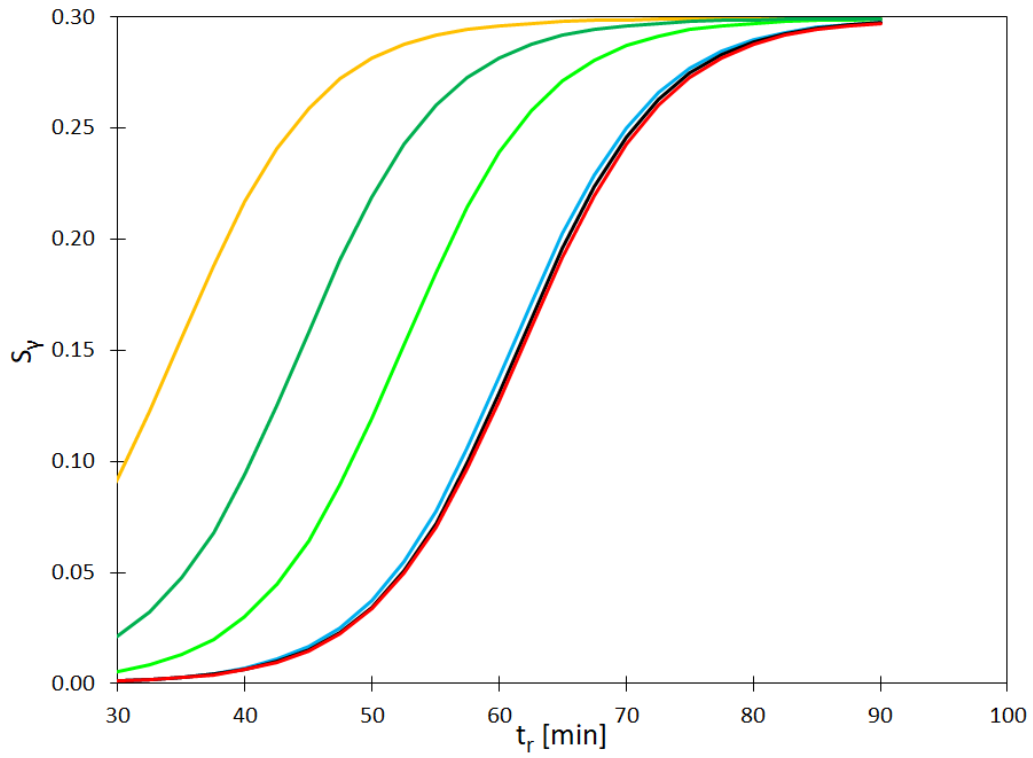

**Figure S15. Influence of rainfall duration ( $t_r$ ) depending on catchment and stormwater network characteristics (Imp, Impd, Vk, Jkp, Gk) on the sensitivity coefficient  $S_\gamma$ .**

165

170

175

180

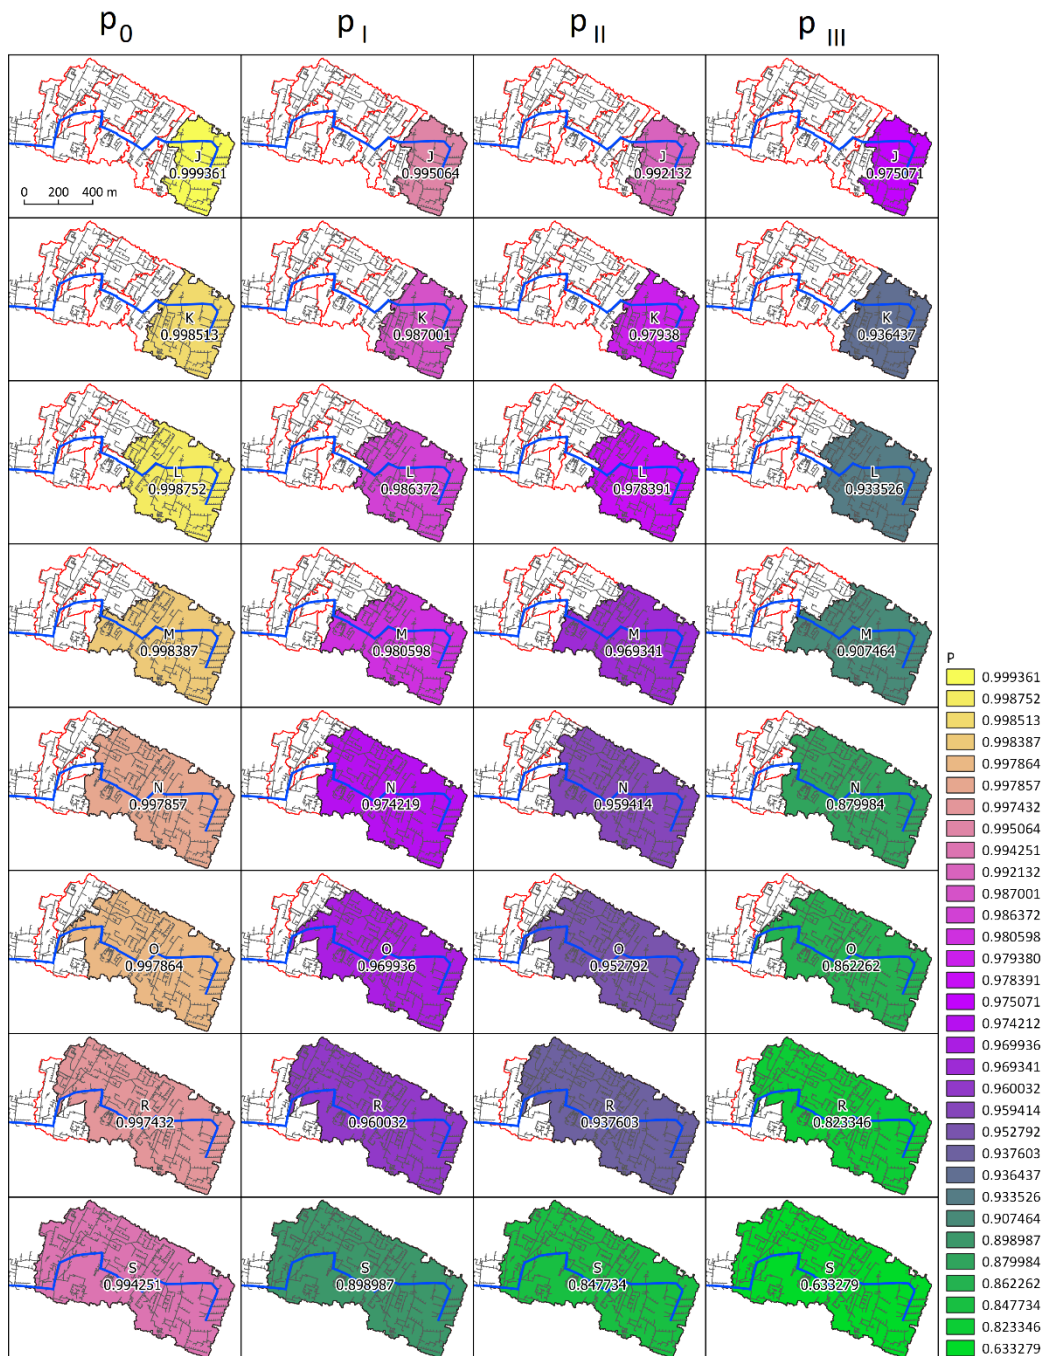

**Figure S16. Probability of specific flood volume for separate sub-catchments (J, K, L, M, N, O, R, S) for the current state and modernisation options (I, II, III).**

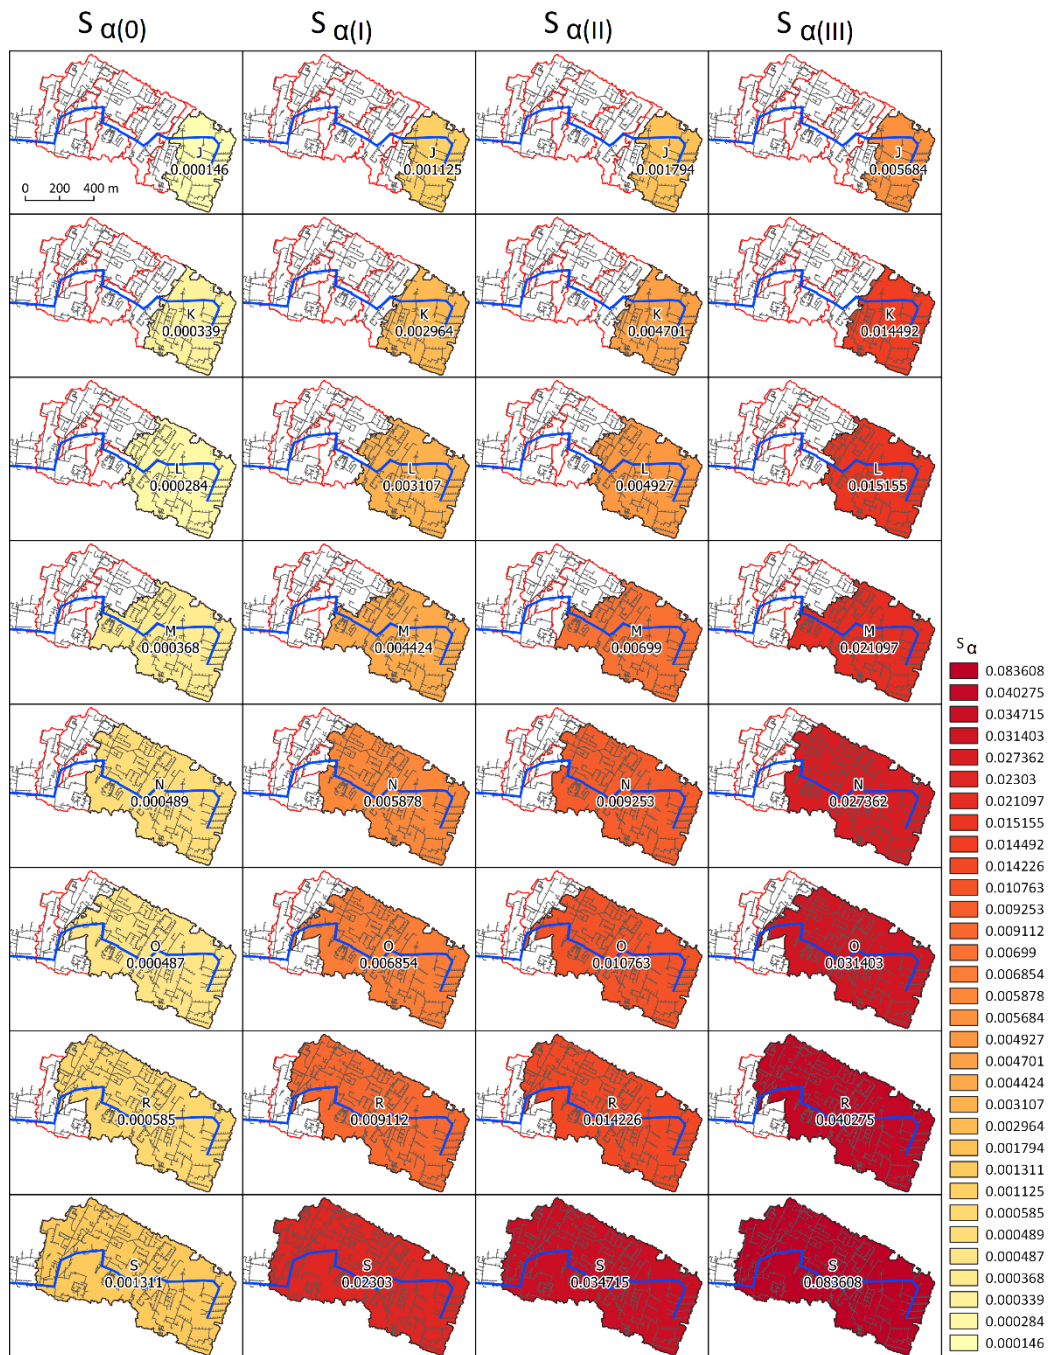

Figure S17. Sensitivity coefficient  $S_{\alpha}$  for separated of the sub-catchments (J, K, L, M, N, O, R, S) for the current state and modernisation options (I, II, III).

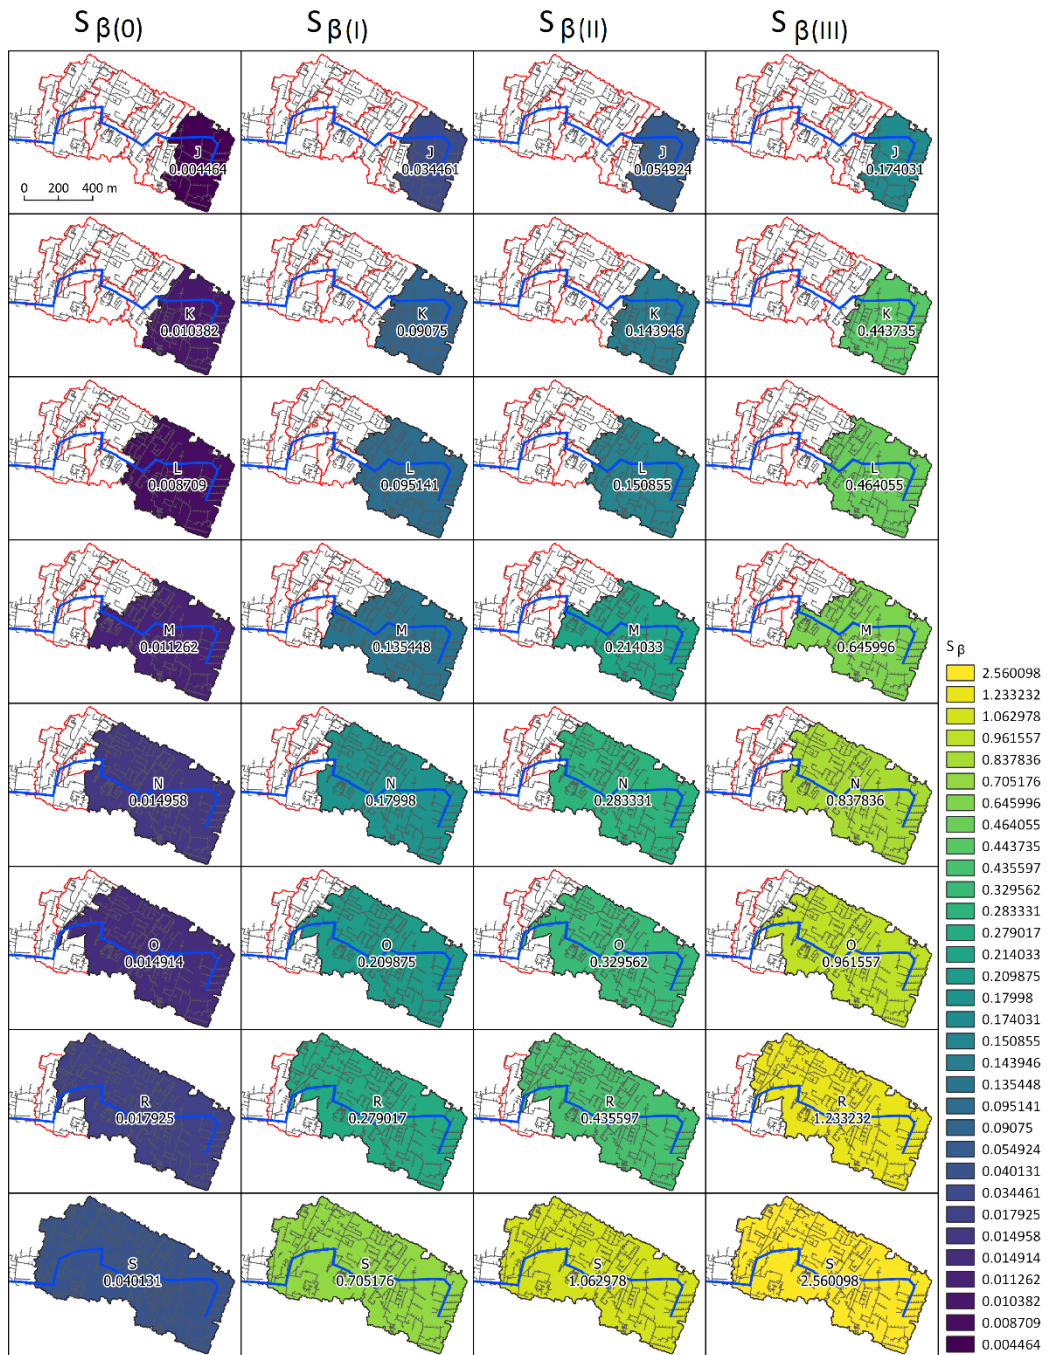

Figure S18. Sensitivity coefficient  $S_{\beta}$  for separated of the sub-catchments (J, K, L, M, N, O, R, S) for the current state and modernisation options (I, II, III).

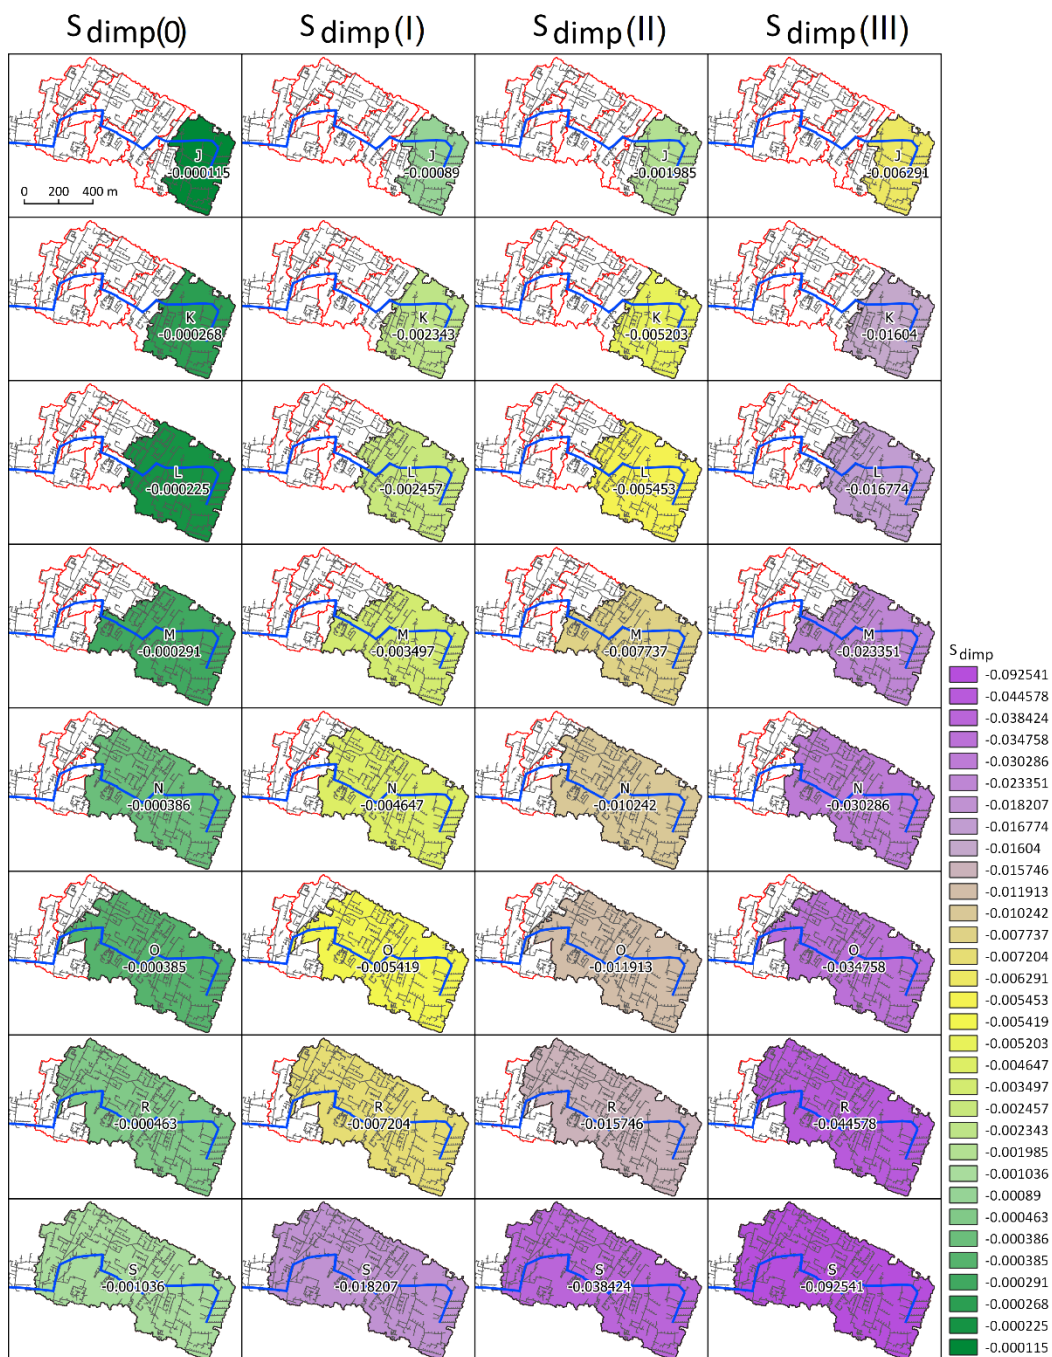

**Figure S19. Sensitivity coefficient  $S_{dimp}$  for separated of the sub-catchments (J, K, L, M, N, O, R, S) for the current state and modernisation options (I, II, III).**

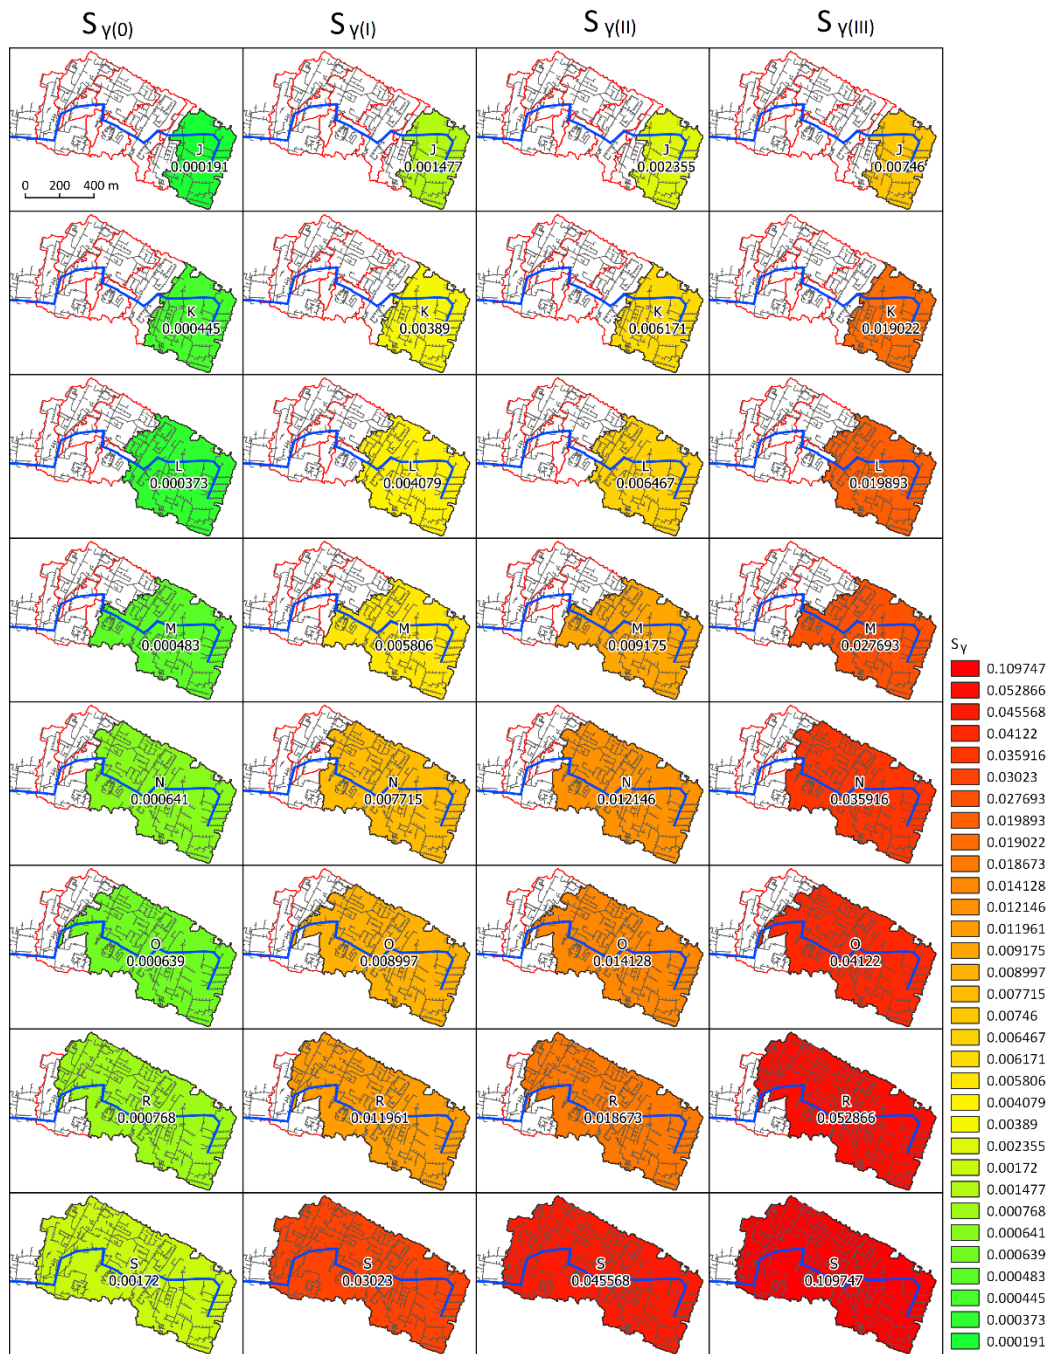

Figure S20. Sensitivity coefficient  $S_\gamma$  for separated of the sub-catchments (J, K, L, M, N, O, R, S) for the current state and modernisation options (I, II, III).



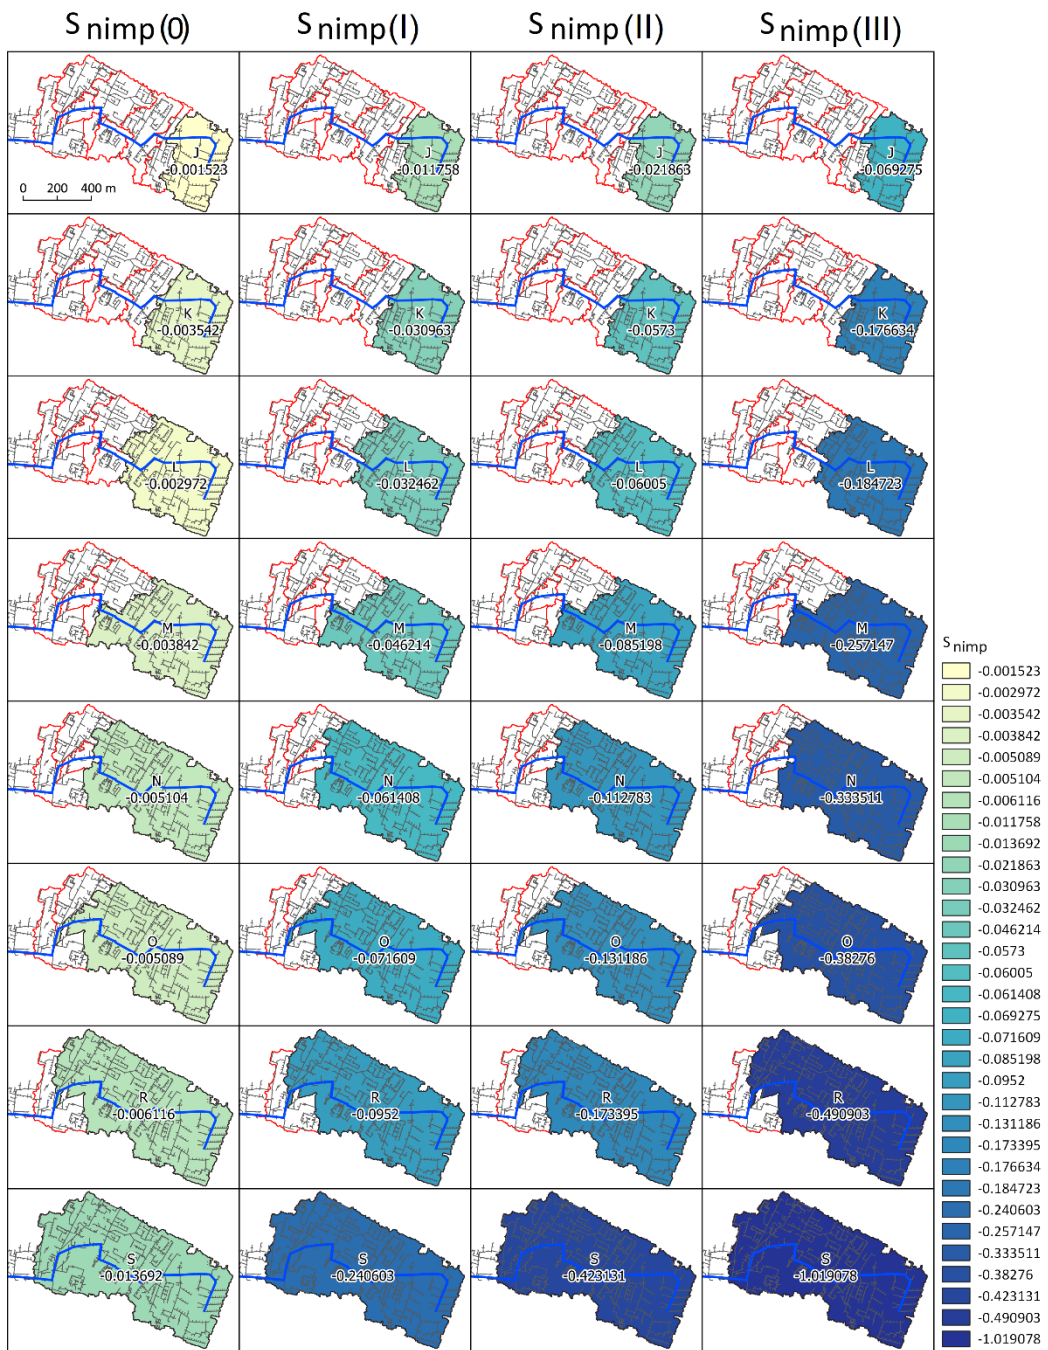

Figure S21. Sensitivity coefficient  $S_{nimp}$  for separated of the sub-catchments (J, K, L, M, N, O, R, S) for the current state and modernisation options (I, II, III).

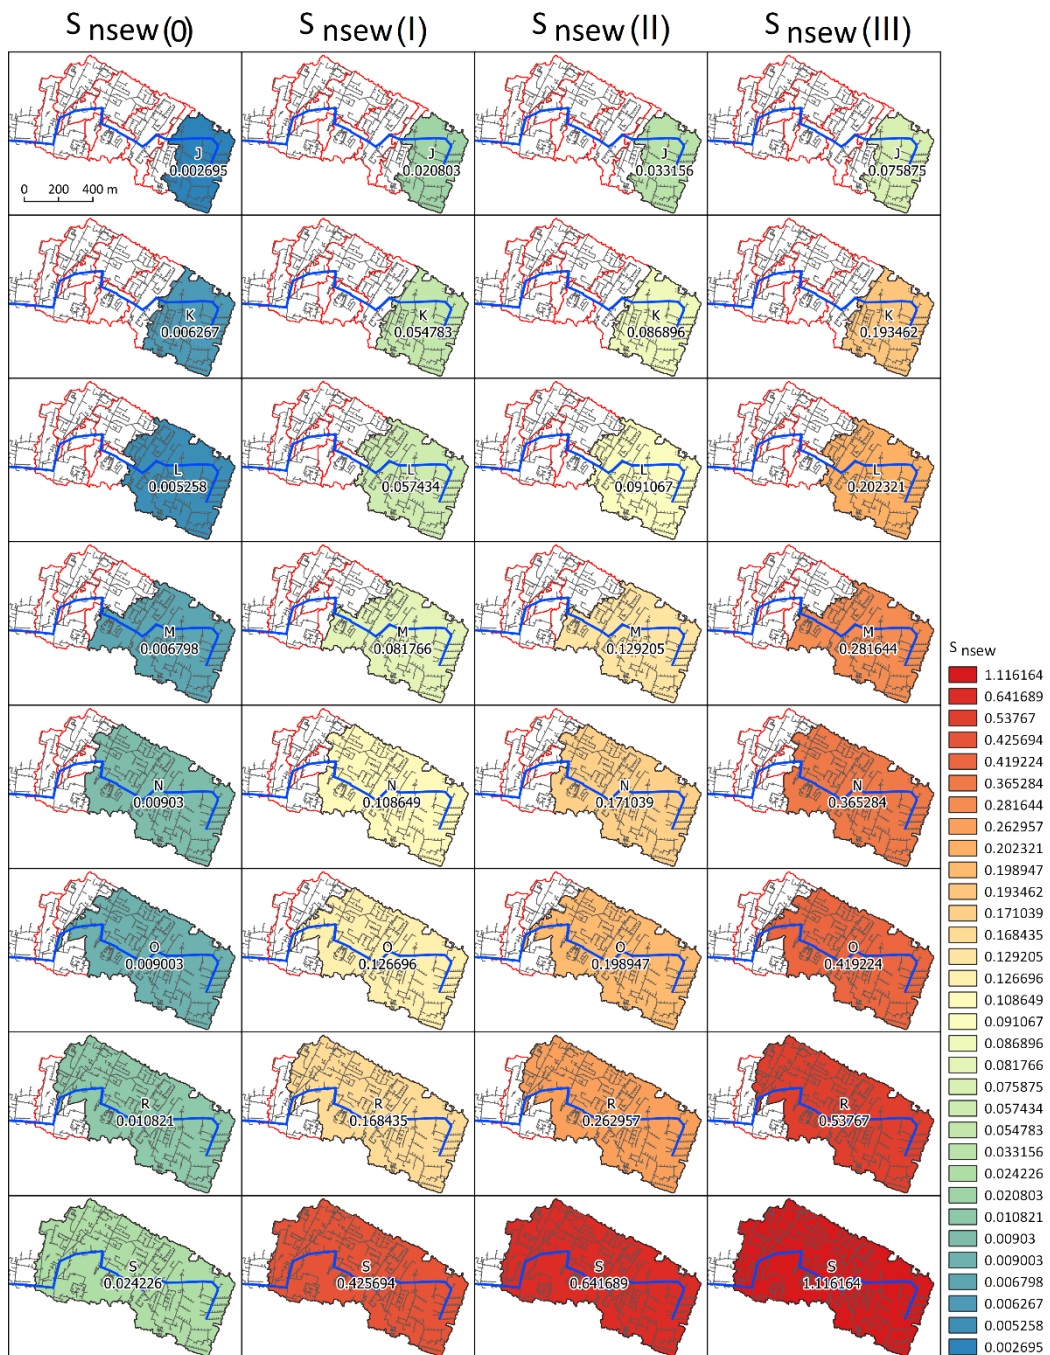

Figure S22. Sensitivity coefficient  $S_{nsew}$  for separated of the sub-catchments (J, K, L, M, N, O, R, S) for the current state and modernisation options (I, II, III).

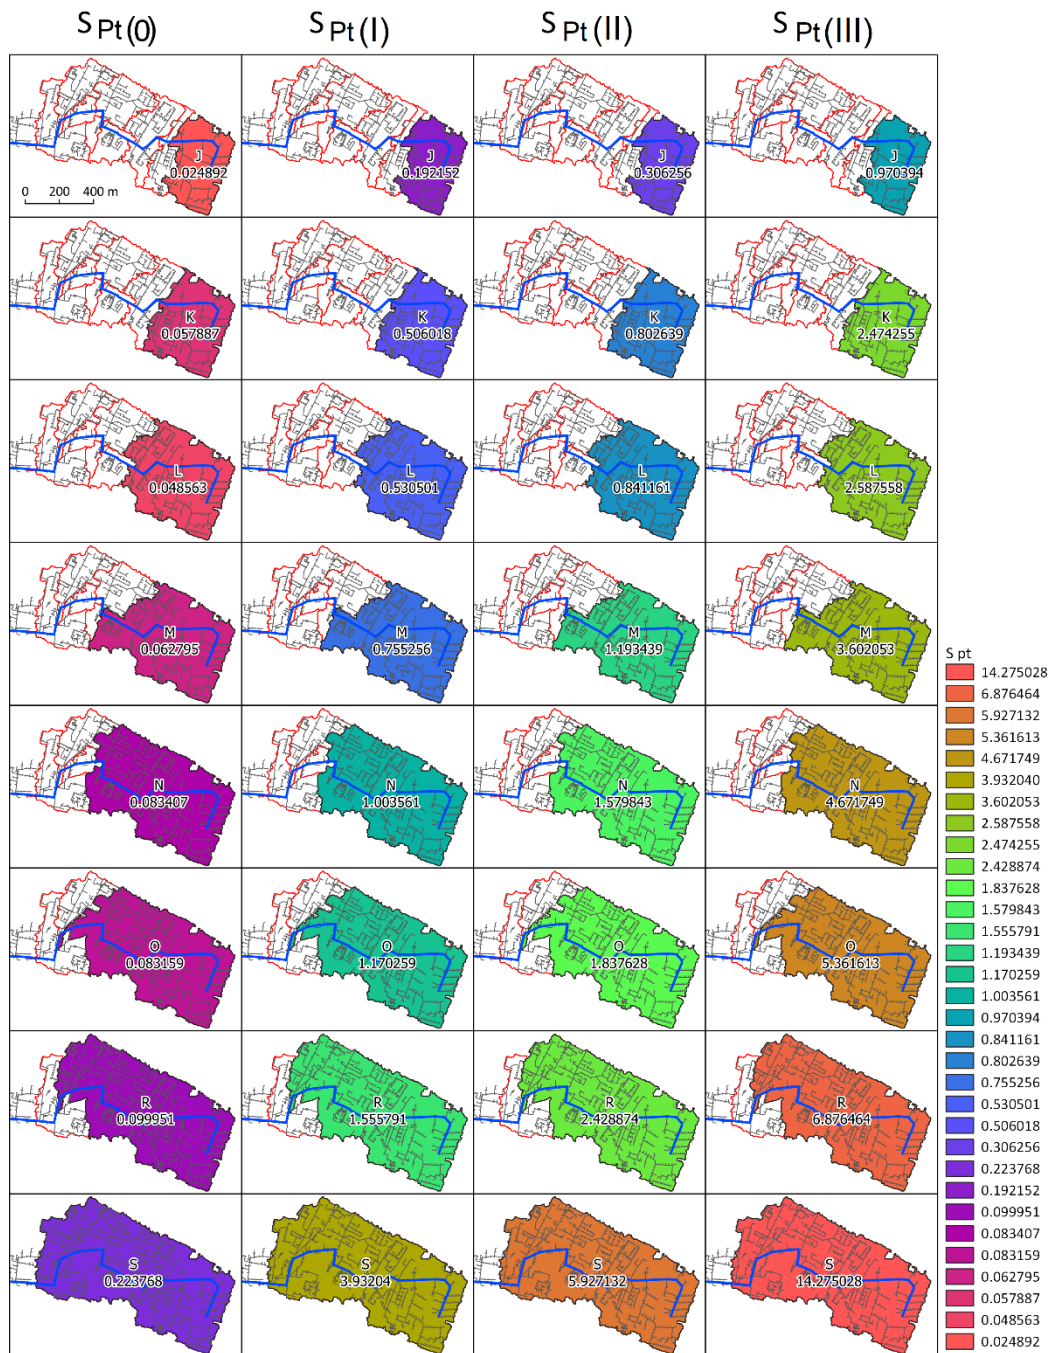

Figure S23. Sensitivity coefficient  $S_{Pt}$  for separated of the sub-catchments (J, K, L, M, N, O, R, S) for the current state and modernisation options (I, II, III).

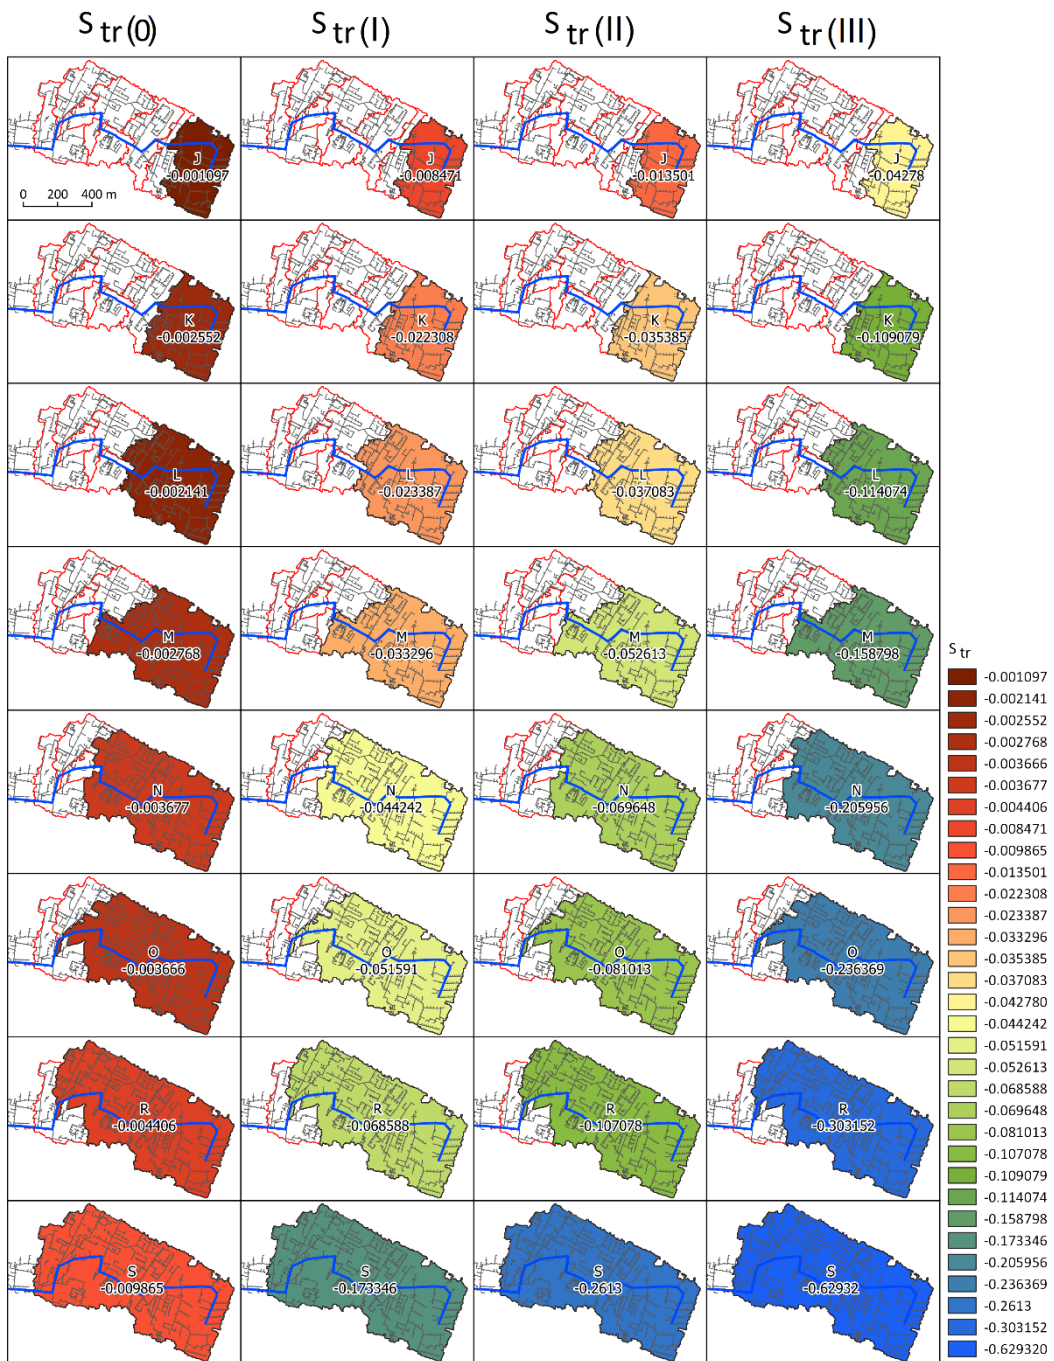

Figure S24. Sensitivity coefficient  $S_{tr}$  for separated of the sub-catchments (J, K, L, M, N, O, R, S) for the current state and modernisation options (I, II, III).

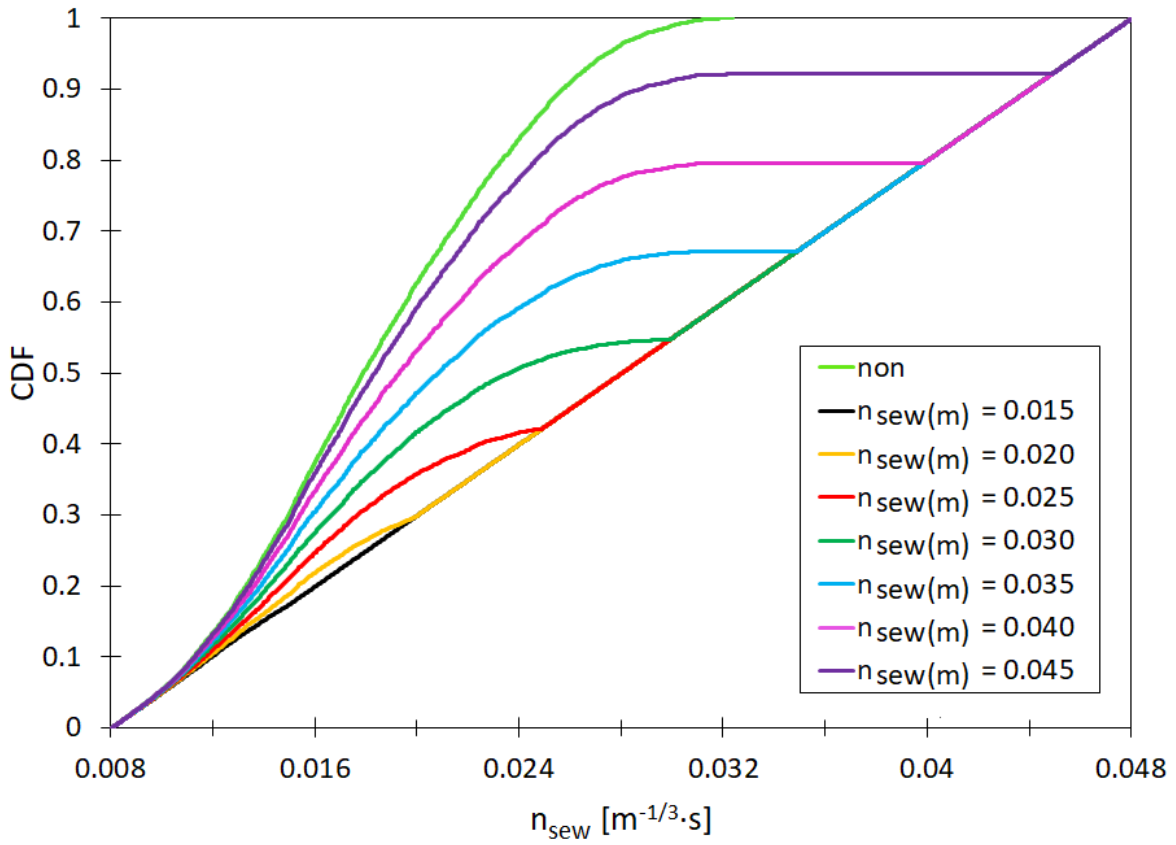

**Figure S25. Empirical distributions of Manning roughness coefficients of channels ( $n_{sew}$ ) for  $n_{sew(m)}=0.015 - 0.045 \text{ m}^{-1/3}\cdot\text{s}$ ,  $Imp = 0.35$  and  $Impd = 0.42$ .**

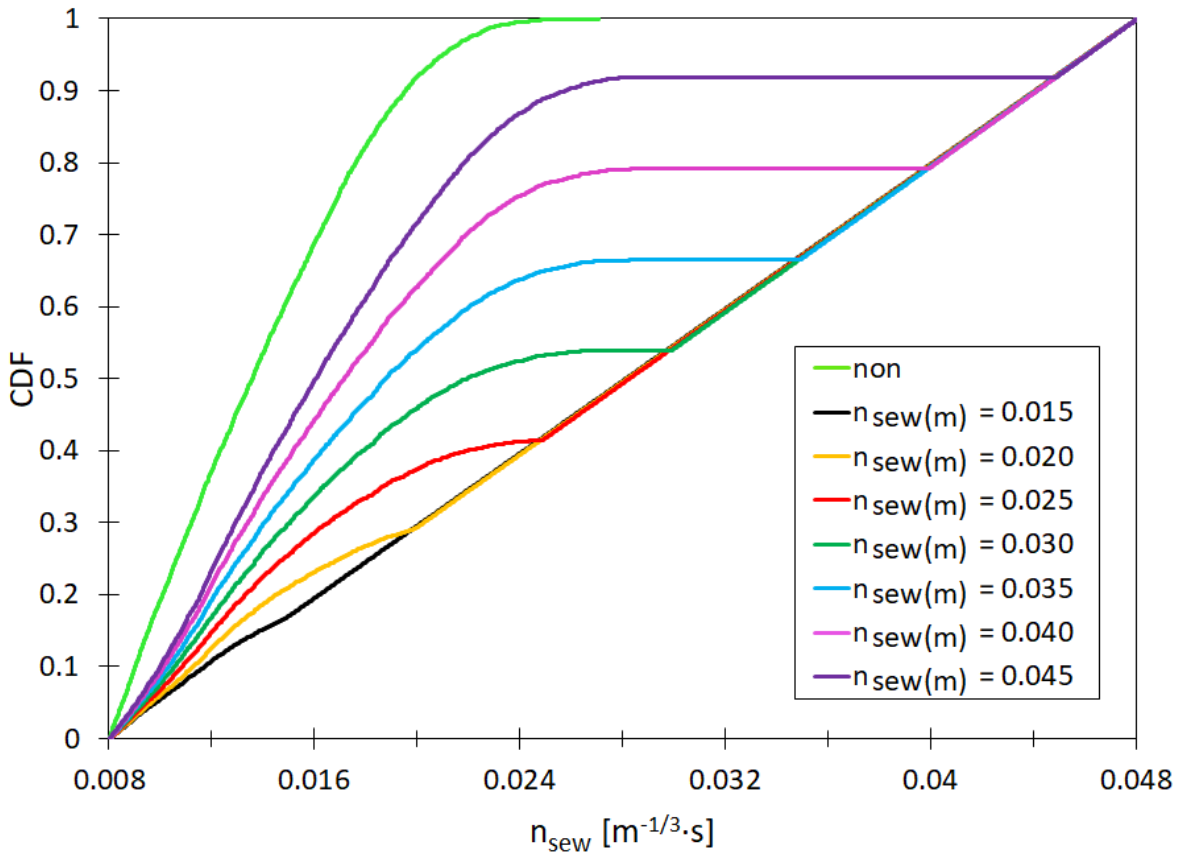

**Figure S26. Empirical distributions of Manning roughness coefficients for channels ( $n_{sew}$ ) for  $n_{sew(m)}=0.015 - 0.045 m^{-1/3} \cdot s$ ,  $Imp = 0.35$  and  $Impd = 0.40$ .**
