# Supplementary material for: The role of catchment characteristics, sewer network, SWMM model parameters in urban catchment management based on stormwater flooding: modelling, sensitivity analysis, risk assessment
Source: Copernicus journal article supplement (doi:10.5194/hess-2022-109), 2022-03-23
Supplement: Supplementary file [file hess-2022-109-AC3-supplement.pdf]

## **Review 1**

***Title: The title is long, unclear and very descriptive. Furthermore, it does not reflect the main contribution of this research, which I believe is: "In our study, a novel algorithm for creating a simulator to predict specific flood volume is developed."***

## **Response 1**

Dear Reviewer, Thank you for your comment. Actually, the purpose of the paper was to develop an advanced simulator of specific flood volume and to determine the influence of catchment characteristics and rainfall data on the results of the sensitivity analysis. With this fact in mind, we plan to modify the current title to read: , "An advanced algorithm for computing stormwater flooding volume: simulation, sensitivity analysis". We hope that the new title fully reflects the content of our study and at the same time is it is more clear.

## **Review 2**

***Line 42: »One of the main factors leading to hydraulic overloads is associated with the wearing of storm sewers resulting in increased roughness.« Please provide a reference for this statement***

## **Response 2**

Dear Reviewer, Thank you for your comment. The increase in channel wall roughness is a result of both abrasion and sediment deposition. The effect of uncertainty in hydraulic conditions in channels, the amount of sediment deposited in them, on the increase in channel wall roughness was analyzed in detail by Shirazi et. al. (2014), Caradot et al. (2017). In addition, Bijnen et al. (2012) performing hydraulic analyses of sewer network performance showed the influence of hydraulic conditions in the sewers (increase in roughness due to abrasion, deposited sediments) on the results of sewer spill simulations.

## **Review 3**

***Line 46: You comment that the frequency of stormwater flooding has a typically qualitative character. Can you please explain this? In my opinion, it has a quantitative character, as can be found in the mentioned standards.***

## **Response 3**

Dear Reviewer, Thank you for your comment. When we used the term quality variable, we had in mind the phenomenon of stormwater flooding itself. Stormwater flooding may or may not occur. In the context of catchment management, sewage network corrective actions (implementation of green infrastructure, construction of reservoirs, etc.), the extent of flooding (area, depth, volume) and its impact on the living conditions of society and the environment are important. The planned modifications include a revision of the manuscript (text below).

„Climate change and urbanisation are major drivers of increased frequency and severity of hydraulic overloads in urban catchments, leading to flooding events, which cause decrease of life standard, material losses, traffic difficulties etc. (Petit-Boix et al., 2017; Chang et al., 2021). One of the main factors leading to hydraulic overloads is associated with the wearing of storm sewers resulting in increased roughness (Bijnen et al., 2012; Caradot et al., 2017). Therefore, criteria for assessing

stormwater network operating were introduced, which should be taken into consideration both at the design stage and while planning corrective actions. According to these criteria, one of the key assessment parameters is a maximum number of stormwater flooding in return period (DWA – A118E, 2006; EN – 752, 2006). Although the above criterion is quantitative in nature, it does not express volume, area, depth of the stormwater flooding (...), what is important plays a role in the decision to corrective actions the sewage network. Based on computation results for stormwater networks, Siekmann and Pinekamp (2011) defined the boundary values of specific flood volume which expressed the volume of stormwater flooding per unit impervious area.”

## **Review 4**

***Line 65: You state that model calibration consists of two stages: sensitivity analysis and uncertainty. This might be true in mechanistic modelling. However, this is not the case for data-driven methods, which can be also used for model calibration. Please refine this statement***

## **Response 4**

Dear Reviewer, Thank you for your comment. Of course sensitivity and uncertainty analysis is implemented for mechanistic models. For models based on machine learning methods other simulation approaches are implemented such as Cateri Paribus analysis, GSA, Shapley index. A modification of the manuscript is planned (text below)

„In case of machine learning methods (Ke et al., 2020) identification of model structure requires implementation of advanced optimization algorithms (Mignot et al., 2019), while for sensitivity analysis Cateri Paribus (Wang et al. 2020), Shapley index (Yang et al., 2020), GSA (Global Sensitivity Analysis; Saltelli et al. 2000) methods are used”

Saltelli, S. Tarantola, F. Campolongo. (2000). Sensitivity analysis as an ingredient of modelling. *Statistical Science*, 15(4), 377–395.

Wang, D., Sven Thunéll, S., Lindberg, U., Jiang, L., Trygg, J., Tysklind, M., Souihi, N. (2020). A machine learning framework to improve effluent quality control in wastewater treatment plants. *Science of the Total Environment*, 784, 147138.

Yang, Y., Chui, T.F.M.: Modeling and interpreting hydrological responses of sustainable urban drainage systems with explainable machine learning methods, *Hydrol. Earth Syst. Sci.*, 25, 5839–5858, <https://doi.org/10.5194/hess-25-5839-2021>, 2020.

## **Review 5**

***Line 70: »Sensitivity analysis is limited to sub-catchments, and so it is impossible to predict the impact of catchment characteristics on calculation results.« This sentence is unclear. Since the catchment consists of sub-catchment they should reflect the characteristics of the catchment. Please clarify.***

## **Response 5**

Dear Reviewer, Thank you for your comment. Analyzing the results of the sensitivity analysis calculations for different urban catchments (Fraga et al. 2016; Freni et al., 2012) one can find, a large variation in the simulation results. In some catchments, the greatest influence on catchment outflow/flooding volume is the roughness coefficient of impervious areas, and in other cases the Manning roughness coefficient of channel. Therefore, it seemed expedient to develop a methodology that would allow for the adopted values of catchment characteristics, sewer network to determine the influence of calibrated parameters on the results of simulation of stormwater flooding volume. Currently, sensitivity analysis, if performed at the stage of hydrodynamic model calibration, calculations are usually performed for the cross-section closing the catchment. The literature review shows (Fatonet al. 2021; Gupta and Razhavi 2016; Cristiano et al., 2018) that in most of the studies the sensitivity variability (influence of the calibrated parameters on the flooding volume) at the catchment scale is neglected. Therefore, to make this possible, sub-catchments characterized by different land use, sewerage network were separated in the considered catchment.

## **Review 6**

***Line 84: “The calibration of such a model is simpler in comparison to hydrodynamic models due to the fact that a number of advanced statistical methods are already implemented in computing packages.« Aren't all of these hydrodynamic models? Please clarify***

## **Response 6**

Dear Reviewer, Thank you for your comment. Of course, hydrodynamic models are mechanistic models and models based on machine learning methods. The difference is that mechanistic models and models based on machine learning methods are calibrated differently.

## **Review 7**

***Line 145: “A failure was defined as exceedance of certain specific flood volume which points out that modernisation of the stormwater network is necessary.” Maybe replacing old pipes with bigger ones is not the only and the most efficient solution. Perhaps a different rainwater management approach should be used (e.g., SUDS). Please rephrase accordingly.***

## **Response 7**

Dear Reviewer, Thank you for your comment. Modified the term failure to read: A failure is defined as a state of operation of a stormwater drainage system (assumed rainfall load) in which hydraulic overloading occurs, channel capacity is exceeded, resulting in a specific flood volume of not less than  $13 \text{ m}^3 \cdot \text{ha}^{-1}$ . This requires corrective actions of the system and reduction of the runoff from

the catchment by implementing rainfall management systems (alternatively improving the efficiency of the existing type of permeable surfaces, rainwater reservoirs, etc.), increasing sewer retention. We agree, that the term “modernization” is a oversimplification and in the revision a more general statement should be used, e.g. “indicates that corrective actions have been taken, such as using larger diameter pipes or increasing water retention in the upper catchment area”.

## **Review 8**

***Line 146: I apologize if I missed this information somewhere earlier. At this point, we do not know yet what a “unit” is/represents. Please add an explanation.***

## **Responses 8**

Dear Reviewer, Thank you for your comment. Indeed, definitions like unit volume may have appeared in the manuscript, but it is the same as specific flood volume. This will be corrected at the manuscript revision stage.

## **Review 9**

***Line 151: “The proposed computation algorithm consists of 11 modules.« It is unclear, which are the 11 modules. In Figure 2 we only see 9 modules. Section 3 also ends with Subsection 3.8. (Module 9). Please clarify.***

## **Responses 9**

Dear Reviewer, Thank you for your comment. Of course, the developed algorithm includes 9 computational modules.

## **Review 10**

***Line 169: Please add an explanation of what is “zero-one”.***

## **Responses 10**

Dear Reviewer, Thank you for your comment. The logistic regression method used in this paper belongs to classification models. In this approach, the dependent variables underlying its development include 1 (when the SWMM-calculated value of the specific flood volume exceeds  $13\text{m}^3\cdot\text{ha}^{-1}$ ) or 0 (the SWMM-calculated value of the specific flood volume does not exceed  $13\text{m}^3\cdot\text{ha}^{-1}$ ).

## **Review 11**

***Line 185: Please provide an explanation of what is C.***

## **Reponses 11**

Dear Reviewer, Thank you for your comment. C - return period. This explanation will be added in the revised version of the manuscript.

## **Review 12**

*Lines 180 and 188: Rainfall data for periods 2010 – 2019 and 2010 – 2018 are mentioned. Is this actually the same time period and is this just a mistake? Please clarify.*

## **Responses 12**

Dear Reviewer, Thank you for your comment. Of course it is the same period (2010 - 2019). This will be clarified in the revised version of the manuscript.

## **Review 13**

*Line 238: Please better explain the meaning of numbers: 200, 5000, and 9*

## **Responses 13**

Dear Reviewer, Thank you for your comment. 200 is the number of separated rainfall events; 5000 is the number of simulations of a single rainfall episode taking into account uncertainty, 9 is the number of sub-basins separated in the catchment constituting the basis for the logit model determination. It will be explained in the revised version of the manuscript.

## **Review 14**

*Line 319 and 313: If the terms “failure” and “breakdown” are referring to the flooding of the stormwater system, I would propose that you use the same and most clear word everywhere.*

## **Responses 14**

Dear Reviewer, Thank you for your comment. We will, of course, standardize the nomenclature throughout the manuscript if possible.

## **Review 15**

*Line 323: Please clarify what is MC.*

## **Responses 15**

Dear Reviewer, Thank you for your comment. MC means Monte Carlo (random number generator)

## Review 16

**Line 349: Please use the same abbreviation for the likelihood function in Figs. S3- S10, and Section 3.3.**

## Responses 16

Dear Reviewer, Thank you for your comment. This will be included in the manuscript

## Review 17

**Lines (371-374): It is not clear how equations 9-12 were derived. Please provide an explanation.**

## Responses 17

Dear Reviewer, Thank you for your comment. In order to clarify the equations, the description of the logistic regression method was modified. The proposed modification is included below.

### 3.5. Developing a logistic regression model (module 5)

Logistic regression, also known as the logit model, is a tool used for classification. Its benefits in comparison to widely used methods arise from the fact that computation results range from 0 to 1 and they represent probability values. This model has been already applied for modelling storm overflows (Szeląg et al., 2020), identifying stormwater flooding from manholes (Jato – Espino et al., 2018) and the technical condition of sewage systems (Salman and Salem, 2012). The logistic regression model is described by the following equation:

$$p_m = \frac{\exp(\alpha_0 + \alpha_1 \cdot x_1 + \alpha_2 \cdot x_2 + \alpha_3 \cdot x_3 + \dots + \alpha_i \cdot x_i)}{1 + \exp(\alpha_0 + \alpha_1 \cdot x_1 + \alpha_2 \cdot x_2 + \alpha_3 \cdot x_3 + \dots + \alpha_i \cdot x_i)} = \frac{\exp(X)}{1 + \exp(X)} = \frac{\exp(X_{rain} + X_{SWMM} + X_{Catchm})}{1 + \exp(X_{rain} + X_{SWMM} + X_{Catchm})} \quad (4)$$

where  $p_m$  – probability of a specific flood volume (understood as the need to corrective actions the stormwater network);  $\alpha_0$  – absolute term;  $\alpha_1, \alpha_2, \alpha_3, \alpha_i$  – values of coefficients estimated with the maximum likelihood method,  $X$  – vector describing the linear combination of the independent variables;  $X_{rain}$  – vector describing linear combination of  $t$  statistically significant rainfall characteristics ( $X_{rain} = \sum_{s=1}^t \alpha_s \cdot x_s$ );  $X_{SWMM}$  – vector describing linear combination of  $m$  statistically significant SWMM parameters ( $X_{SWMM} = \sum_{k=1}^m \alpha_k \cdot x_k$ );  $X_{Catchm}$  – vector describing linear combination of  $r$  statistically significant catchment characteristics, and stormwater network characteristics confidence level – 0.05 ( $X_{Catchm} = \sum_{p=1}^r \alpha_p \cdot x_p$ );  $x_i$  – independent variables describing rainfall characteristics, e.g., rainfall depth, its duration, and the parameters calibrated in the SWMM, catchment characteristics (permeability, terrain retention, density of stormwater network, length, slope, retention in stormwater channels etc.). Independent variables in the logit model were calculated using the forward stepwise algorithm, recommended for the creation of such models. At the same time, it also ensures the elimination of correlated independent variables (Harrell 2001). The estimation of the coefficients  $\alpha_i$  in equation (4) and thus the determination of the logistic regression model involved two stages: learning (80% of the data i.e. 7.200.000) and testing (20% of the data i.e. 1.800.000).

### 4.3. Determination of the logistic regression model (module 5)

A logistic regression model was built based on the operational simulation of the stormwater network. The model can be used to identify specific flood volume and for decision-making regarding corrective actions

of the stormwater system. The relationship from Equation (3) can be described by the following linear combination:

$$X_{rain} = 4.05 \cdot P_{tot} - 0.18 \cdot t_r - 54.15 \quad (10)$$

$$X_{SWMM} = 0.23 \cdot \alpha - 79.40 \cdot n_{imp} + 6.23 \cdot \beta + 0.33 \cdot \gamma + 234.12 \cdot n_{sew} \quad (11)$$

$$X_{Catchm} = 76.72 \cdot Imp + 40.77 \cdot Impd - 0.01 \cdot Vk - 1967.04 \cdot Gk - 1169.00 \cdot Gkd - 20.33 \cdot Jkp \quad (12)$$

For other independent variables (Tab. S2) the determined coefficients appeared to be statistically insignificant in prediction confidence band 0.05. Standard deviations of the coefficients estimated from the logit model and the test probabilities are presented in Tab. S2. The performed computations indicated that the best fit of the computed results to the measurement data was obtained for  $p_{m,cr} = 0.75$ . For the test data set (20%) the following values were obtained: SPEC = 95.24%, SENS = 84.62% and Acc = 87.87%.

## **Review 18**

*Line 384: You refer to Fig. 3, but it seems you are referring to Fig. 4. Please check*

## **Responses 18**

Dear Reviewer, Thank you for your comment. We apologize for the mistake, of course it should be figure 4, this will be corrected.

## **Review 19**

Line 505 – 507: “However, to date, there has been no statistical model that would take into account both hydrodynamic model parameters as well as catchment and stormwater network characteristics.« Please clarify, aren't the parameters of the hydrodynamic models reflecting (i.e., are the same as) catchment and stormwater network characteristics?

## **Responses 19**

Dear Reviewer, Thank you for your comment. In the context of the above comments, we meant that hydrodynamic models based on machine learning methods do not simultaneously take into account rainfall data, catchment characteristics, sewer network, catchment retention, retention and sewer network capacity. The inclusion in the developed simulator of catchment characteristics (impervious area), sewer network (sewer network density, retention, channel longitudinal slope), area retention (Manning's roughness coefficient of impervious areas, retention depth of impervious area, correction coefficient for percentage area) and channel capacity (Manning's roughness coefficient) makes it possible to apply the model to catchment management. Thus, the obtained simulator is an alternative to the used mechanistic models and does not require calibration, which is important from the point of view of implementation for catchments with different characteristics.

## **Review 20**

*Line 548: Please clarify what are lower and upper parts.*

## **Responses 20**

Dear Reviewer, Thank you for your comment. We had in mind the catchment area and the lower and upper streams

## **Review 21**

*Lines 553, 554: You refer to the proposed algorithm as a tool. Please use one word consistently. As mentioned before, it would be beneficial to reconsider the article title accordingly.*

## **Responses 21**

Dear Reviewer, Thank you for your comment. The vocabulary will be standardized. As suggested by the Reviewer, the title of the article has been corrected.

## **Review 22**

*Discussion and Conclusions: Some of the results presented in this article are expected and not so novel for the urban drainage modelling community (e.g., impervious area leads to an increase of flooding).*

## **Responses 22**

Dear Reviewer, Thank you for your comment. In accordance with the above comments, we have planned to revise the discussion and conclusions by reducing repetition. The difference between the models developed so far and the one presented in this manuscript has been highlighted. The influence of catchment characteristics and rainfall data on the obtained relationships between specific flood volume and calibrated SWMM model parameters was noted. Proposed corrections are provided below.

Developing and calibrating mathematical models to simulate stormwater network operation under hydraulic overloads is one of the latest areas of research. In comparison to the statistical models used so far (Li and Willems, 2019; Thorndahl 2009), the approach proposed in our study includes SWMM model parameters describing catchment retention and, at the same time, the characteristics of the catchment and stormwater network (tab. S4). **Apart from the model developed in this study, the above mentioned factors are only included in mechanistic models, which have a form of differential equations. Therefore, they require a large number of simulations in order to determine the impact of selected variables on computation results of specific flood volume. Models developed with machine learning methods are free of such drawbacks (tab. S4), which have a form of empirical relationships. In contrast, in case of models developed with neuron networks, there is a need of performing additional analyses (Ke et al, 2020; Yang et al., 2020).**



**Tab. S4. Comparison of developed model for identification of specific flood volume to literature data**

| Study                       | Criteria               | M | I | R | C | S | P |
|-----------------------------|------------------------|---|---|---|---|---|---|
| Duncan et al. (2011)        | occurrence of flooding | ✓ | • | ✓ | ✓ | ✓ | • |
| Jato - Espino et al. (2018) | occurrence of flooding | ✓ | ✓ | ✓ | ✓ | ✓ | • |
| Jato - Espino et al. (2019) | occurrence of flooding | ✓ | • | ✓ | ✓ | ✓ | • |
| Li and Willems (2020)       | occurrence of flooding | ✓ | ✓ | ✓ | ✓ | ✓ | • |
| Szeląg et al. (2022)        | occurrence of flooding | ✓ | ✓ | ✓ | ✓ | ✓ | ✓ |
| Szeląg et al. (2021)        | volume                 | • | • | ✓ | ✓ | ✓ | ✓ |
| Thorndahl et al. (2008)     | volume                 | ✓ | ✓ | ✓ | • | ✓ | ✓ |
| Verbovski et al. (2022)     | volume                 | ✓ | ✓ | ✓ | • | • | • |
| Fu et al. (2011)            | volume                 | • | • | ✓ | ✓ | ✓ | ✓ |
| Chen et al. (2020)          | volume                 | • | • | ✓ | ✓ | ✓ | ✓ |
| Fraga et al. (2016)         | volume                 | • | • | ✓ | ✓ | ✓ | ✓ |
| this study                  | volume                 | ✓ | ✓ | ✓ | ✓ | ✓ | ✓ |

where: M (method); the models were divided into two groups: mechanistic (•) and machine learning (✓); R (rainfall); C (catchment); S (sewer); P (calibration parameter); I (interpretation model, based on estimated factors the impact of analysed factors on stormwater flooding can be determined).

Jato – Espino et al. (2018, 2019) and Li and Willems (2020) analysed stormwater flooding from manholes based on catchment characteristics and stormwater network characteristics (tab S4). Szeląg et al. (2022) confirmed their results and developed a model for identification of stormwater flooding in a catchment. Besides, by indicating the impact of uncertainty of SWMM model parameters on stormwater flooding, Szeląg et al. (2021) proved that previous approaches require further development. In the wider context of catchment management, their approach does not apply for the characteristic of the materials used for road, roofs or parking places, etc. Fu et al. (2011) and Thorndahl et al. (2009) analyzed the uncertainty of the identified parameters, which allowed, for example, to correct for impervious area retention, roughness coefficient without being able to correct for catchment imperviousness, which limited the use of the models in catchment management. The approach proposed in our study is a combination of these two solutions, which provides a tool which can be successfully implemented to manage other catchments.

The results of our study confirmed the major significance and huge interaction between catchment characteristics and SWMM model parameters. This fact can be further compared by several references (Li and Willems, 2020; Jato – Espino et al., 2019; Zhuo et al., 2019) presenting comparisons of flooding simulations in urban catchments. Our analysis indicated that an impervious area in a catchment (Imp, Impd) leads to the increase of flooding; reverse dependency was obtained by Jato – Espino et al. (2018) when modelling flooding from manholes. Increase in channel volume above the closing cross-section of a catchment (Vk) and its longitudinal slope (Jkp) results in the decrease of flooding, that was confirmed by computations performed for Espoo catchment in Finland (Jato – Espino et al. 2019). Interestingly, the increase of unit impervious area per the length of main stormwater interceptor (Gk, Gkd) results in smaller volume of stormwater flooding. This result is absolutely right due to the fact that the longer the channel, the greater the number of manholes.

Huang et al. (2018) based on observations conducted in a complex stormwater system indicated the impact of catchment location and hydrological conditions on the peak flow. Yao et al. (2019) obtained similar results after computations with a mechanistic model for catchments in Beijing and in Dresden (Reyes – Silva et al. 2020).

Calculation results obtained in this study confirmed relevant impact of rainfall data, catchment characteristics, and stormwater network characteristics on sensitivity coefficients – relationships between SWMM parameters and specific flood volume. For rainfall data and catchment characteristics (assumed as constant) it was proved that correction coefficient of impervious area ( $\beta$ ) and the Manning roughness coefficient for channels ( $n_{sew}$ ) have the greatest impact on specific flood volume. The results of our computations are consistent with Thorndahl et al. (2009), who simulate flooding from a single manhole in the Frejlev catchment (Belgium), based on rainfall data and calibrated parameters of a mechanistic model. These findings were confirmed by calculations Fu et al. (2012) and Prodanovic et al. (2022) respectively for catchments of 400 ha and 8 ha. Szeląg et al. (2021) based on simulations with mechanistic model including uncertainty of SWMM parameters proved the key impact of Manning roughness coefficient of sewers on specific flood volume (for rainfall episod  $t_r = 30$  min and  $P_t = 15.25$  mm). Fraga et al. (2016) used GLUE+ GSA method for a small road catchment and indicated the impact of rainfall data (rainfall duration, depth, temporal distribution) on sensitivity analysis results. It was further confirmed in computations of stormwater flooding using logit model (Szeląg et al. 2022) and specific flood volume calculations with SWMM model (Freni et al. 2012). Xing et al. (2021) used mechanistic model to determine characteristics of spatial development and stormwater characteristics in Chongqing catchment (China) on the depth of stormwater flooding. The aforementioned research studies indicate the impact of rainfall data, catchment characteristics, and stormwater network characteristics on sensitivity of hydrodynamic simulation model for stormwater flooding.

Differences in probability of specific flood volume/sensitivity coefficients indicate the influence of catchments downstream on conditions in the catchment above. The variation in sensitivity coefficients does not account for local conditions within the side channels. Due to the creation of successive sub-catchments by combining them, the conditions of the sewer system in its area are averaged out, making the interpretation of the results difficult. Using the developed tool, catchment management may become difficult when there is a particularly hydraulically overloaded area within the catchment, which impacts neighboring sub-catchments.
